# Supplementary material
Source: ML conference proceedings conference paper supplement (https://openreview.net/forum?id=IT9mWLYNpQ)
Supplement: supplementary_material [file attachment]

---

# Implicit Bias of Gradient Descent for Logistic Regression at the Edge of Stability

---

Anonymous Author(s)

Affiliation

Address

email

## Abstract

Recent research has observed that in machine learning optimization, gradient descent (GD) often operates at the *edge of stability* (EoS) [Cohen et al., 2021], where the stepsizes are set to be large, resulting in non-monotonic losses induced by the GD iterates. This paper studies the convergence and implicit bias of constant-stepsize GD for logistic regression on linearly separable data in the EoS regime. Despite the presence of local oscillations, we prove that the logistic loss can be minimized by GD with *any* constant stepsize over a long time scale. Furthermore, we prove that with *any* constant stepsize, the GD iterates tend to infinity when projected to a max-margin direction (the hard-margin SVM direction) and converge to a fixed vector that minimizes a strongly convex potential when projected to the orthogonal complement of the max-margin direction. In contrast, we also show that in the EoS regime, GD iterates may diverge catastrophically under the exponential loss, highlighting the superiority of the logistic loss. These theoretical findings are in line with numerical simulations and complement existing theories on the convergence and implicit bias of GD, which are only applicable when the stepsizes are sufficiently small.

## 1 Introduction

*Gradient descent* (GD) is a foundational algorithm for machine learning optimization that motivates many popular algorithms. Theoretically, the behavior of GD is well understood when the stepsize is small. In this regard, one of the most classic results is the *descent lemma* (see, e.g., Section 1.2.3 in Nesterov et al. [2018]):

**Lemma** (Descent lemma, simplified version). *Suppose that  $\sup_{\mathbf{w}} \|\nabla^2 L(\mathbf{w})\|_2 \leq \beta^1$ , then*

$$L(\mathbf{w}_+) \leq L(\mathbf{w}) - \eta \cdot (1 - \eta\beta/2) \cdot \|\nabla L(\mathbf{w})\|_2^2, \quad \text{where } \mathbf{w}_+ := \mathbf{w} - \eta \cdot \nabla L(\mathbf{w}).$$

When the targeted function is smooth (such as logistic regression) and the stepsize is *small* ( $0 < \eta < \beta/2$ ), the descent lemma ensures a monotonic decrease of the function value by performing each GD step. Building upon this, a sequence of iterates produced by GD with small stepsizes provably minimizes the function value in various settings (see, e.g., Lan [2020]).

For a more modern example, a recent line of research has established the *implicit bias* of GD with small stepsizes (see Soudry et al. [2018], Ji and Telgarsky [2018b] and references thereafter). Specifically, they consider GD for optimizing logistic regression (besides other loss functions) on

---

<sup>1</sup>The uniformly bounded Hessian norm condition is stated for simplicity and can be relaxed in many ways. For example, it can be replaced by requiring  $L(\cdot)$  to be  $\beta$ -smooth. For another example, it can also be replaced with  $\sup_{0 \leq \lambda \leq 1} \|\nabla^2 L(\lambda \cdot \mathbf{w} + (1 - \lambda) \cdot \mathbf{w}_+)\|_2 \leq \beta$ .

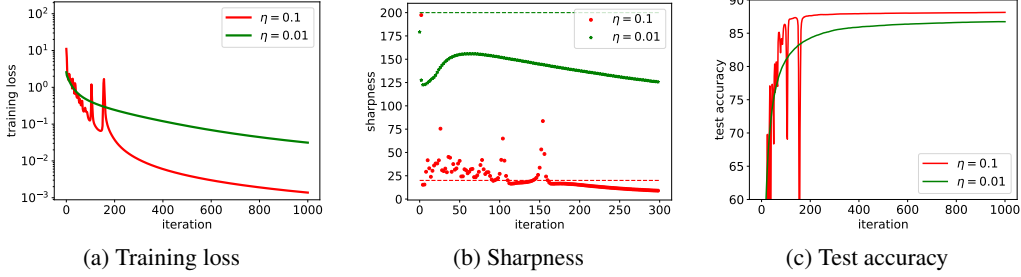

Figure 1: The behaviors of GD for optimizing a neural network. We randomly sample 1,000 data from the MNIST dataset and then use GD to train a 4-layer fully connected network to fit those data. We use the cross-entropy loss, i.e., the multi-class version of the logistic loss. The sub-figures (a), (b), and (c) report the training loss, test accuracy, and sharpness (i.e.,  $\|\nabla L(\mathbf{w}_t)\|_2$ ) along the GD trajectories, respectively. The red curves correspond to GD with a large stepsize  $\eta = 0.1$ , where the training losses oscillate locally and the sharpnesses can exceed  $2/\eta = 20$ . The green curves correspond to GD with a small stepsize  $\eta = 0.01$ , where the training losses decrease monotonically and the sharpnesses are always below  $2/\eta = 200$ . Moreover, (c) suggests that large-stepsize GD achieves better test accuracy than small-stepsize GD, consistent with larger-scale deep learning experiments [Goyal et al., 2017]. More details of the experiments can be found in Appendix D.

linearly separable data. When the stepsizes are sufficiently small, the GD iterates are shown to decrease the risk monotonically (by a variant of the descent lemma); moreover, the GD iterates tend to align with a direction that maximizes the  $\ell_2$ -margin of the data [Soudry et al., 2018, Ji and Telgarsky, 2018b]. The margin-maximization bias of small-stepsize GD sheds important light on understanding the statistical benefits of GD, as a large margin solution often generalizes well [Bartlett et al., 2017, Neyshabur et al., 2017].

Nonetheless, in practical machine learning optimization, especially in deep learning, the empirical risk (or training loss) often varies *non-monotonically* (while being minimized in the long run) — the local risk oscillation is not only caused by the algorithmic randomness but is more an effect of using *large stepsizes*, as it happens for deterministic GD (with large stepsizes) as well [Wu et al., 2018, Xing et al., 2018, Lewkowycz et al., 2020, Cohen et al., 2021]. This phenomenon is showcased in Figures 1(a) and 2(a), and is referred to by Cohen et al. [2021] as the *edge of stability* (EoS). The observation sets a non-negligible gap between practical and theoretical GD setups, where in practice, GD is run with large stepsizes that lead to local risk oscillations, but in theory, GD is only considered with sufficiently small stepsizes, predicting a monotonic risk descent (with a few exceptions, which will be discussed later in Section 2). A tension remains to be resolved:

*Is the convergence of risk under local oscillation merely a “lucky” occurrence,  
or is it predictable based on theory?*

**Contributions.** In this work, we study the behaviors of GD in the EoS regime in arguably the simplest setting for machine learning optimization — logistic regression on linearly separable data. We show that with *any* constant stepsize, while the induced risks may oscillate locally, GD must minimize the risk in the long run at a rate of  $\mathcal{O}(1/t)$ , where  $t$  is the number of iterates. In addition, we show that the direction of the GD iterates (with any constant stepsize) must align with a max-margin direction (the hard-margin SVM direction) at a rate of  $\mathcal{O}(1/\log(t))$ . These results explain how GD minimizes a risk non-monotonically, and complement existing theories [Soudry et al., 2018, Ji and Telgarsky, 2018b] on the convergence and implicit bias of GD, which are only applicable when the stepsizes are sufficiently small.

Some additional notable contributions are

1. We also show that, when projected to the orthogonal complement of the max-margin direction, the GD iterates (with any constant stepsize) converge to a fixed vector that minimizes a strongly convex potential at a rate of  $\mathcal{O}(1/\log(t))$ . This characterization is conceptually more interpretable than an existing version [Soudry et al., 2018].
2. We show that in the EoS regime, GD can diverge catastrophically if the logistic loss is replaced by the exponential loss. This is in stark contrast to the small-stepsize regime, where the behaviors

of GD are known to be similar under any exponentially-tailed losses including both the logistic and exponential losses [Soudry et al., 2018, Ji and Telgarsky, 2018b]. The difference in the EoS regime provides insights into why the logistic loss is preferable to the exponential loss in practice.

3. From a technical perspective, we develop a new approach for analyzing GD with large stepsizes. Our approach views the GD iterates as a coupling of two orthogonal iterates, one along a max-margin direction and the other along the orthogonal complement of the max-margin direction. The former iterates tend to infinity and the latter iterates approximate “imaginary” GD iterates that minimize a strongly convex potential with a *decaying* stepsize scheduler, controlled by the former iterates. Our techniques for analyzing large-stepsize GD can be of independent interest.

## 2 Related Works

In this section, we discuss papers related to our work.

**Implicit bias.** We first review a set of papers on the implicit bias of GD (with small stepsizes).

Along this line, Soudry et al. [2018] are the very first to show that GD converges along a max-margin direction when minimizing the empirical risk of an exponentially-tailed loss function (such as the logistic and exponential losses), a linear model, and linearly separable data. Then, an alternative analysis is provided by Ji and Telgarsky [2018b], which also deals with non-separable data. These two works directly motivate us for considering GD for logistic regression on linearly separable data. However, there are at least three notable differences between our work and theirs. Firstly, their results only apply to GD with small stepsizes, while our results apply to GD with *any* constant stepsize. Secondly, their theories predict no difference between the logistic and exponential losses (as they are limited to the small-stepsize regime). Quite surprisingly, we prove that in the EoS regime, GD can diverge catastrophically under the exponential loss. Thirdly, from a technical viewpoint, their implicit bias analysis is built upon the risk convergence analysis, which further relies on a monotonic risk descent argument, hence only applies to small stepsizes. In comparison, we come up with a new approach that allows analyzing the implicit bias under risk oscillations; the long-term risk convergence is simply a consequence of the implicit bias results. Hence our techniques can accommodate any constant stepsize. See Section 5 for more discussions.

Subsequent works have extended the results by Soudry et al. [2018], Ji and Telgarsky [2018b] to other algorithms such as momentum-based GD [Gunasekar et al., 2018a, Ji et al., 2021] and SGD [Nacson et al., 2019c], and homogenous but non-linear models [Gunasekar et al., 2017, Ji and Telgarsky, 2018a, Gunasekar et al., 2018b, Nacson et al., 2019a, Lyu and Li, 2019] and non-homogenous models [Nacson et al., 2019a]. All these theories require the stepsizes to be small or even infinitesimal, in a regime away from our focus, the EoS regime.

It is worth noting that Nacson et al. [2019b] consider GD with an increasing stepsize scheduler that achieves a faster margin-maximization rate than constant-stepsize GD. However, their stepsize at each iteration is still appropriately small, resulting in a monotonic risk descent by a variant of the descent lemma.

**Edge of stability.** The risk oscillation phenomenon has been observed in several deep learning papers [Wu et al., 2018, Xing et al., 2018, Lewkowycz et al., 2020], and the work by Cohen et al. [2021] coins the term, *edge of stability* (EoS), that formally refers to it. In the remainder of this part, we focus on reviewing the current theoretical progress in understanding EoS.

Zhu et al. [2022] rigorously characterize EoS for a two-dimensional function  $(u, v) \mapsto (u^2v^2 - 1)^2$ . Chen and Bruna [2022] study EoS for a one-dimensional function  $u \mapsto (u^2 - 1)^2$  and for a special two-layer single-neuron network. Ahn et al. [2022a] consider functions  $(u, v) \mapsto \ell(uv)$ , where  $\ell$  is assumed to be convex, even, and Lipschitz; notably, they show a statistical gap between the small-stepsize regime and the EoS regime. Compared to their settings, our problem, i.e., logistic regression, is a natural machine-learning problem with fewer artifacts (if any).

EoS has also been theoretically investigated for general functions [Ma et al., 2022, Ahn et al., 2022b, Damian et al., 2022, Li et al., 2022], but these theories are often subject to subtle assumptions that are hard to interpret or verify. Specifically, Ma et al. [2022] require the function to grow “subquadratically”. Ahn et al. [2022b] assume the existence of a “forward invariant subset” near the set of minima of the function. Damian et al. [2022] assume a negative correlation between the gradient direction and the largest eigenvalue direction of the Hessian. Li et al. [2022] consider a

two-layer neural network but require the norm of the last layer parameter and the sharpness to change in the same direction along the GD trajectory. In comparison, our assumptions are more natural and interpretable.

The unstable convergence has also been studied for normalized GD [Arora et al., 2022, Lyu et al., 2022] and regularized GD [Bartlett et al., 2022]. These algorithms are apart from our focus on the vanilla GD.

### 3 Preliminaries

We use  $\mathbf{x} \in \mathbb{R}^d$  to denote a feature vector and  $y \in \{\pm 1\}$  to denote a binary label, respectively. Let  $(\mathbf{x}_i, y_i)_{i=1}^n$  be a set of training data. Throughout the paper, we assume that  $(\mathbf{x}_i, y_i)_{i=1}^n$  is *linearly separable* [Soudry et al., 2018].

**Assumption 1** (Linear separability). Assume there is  $\mathbf{w} \in \mathbb{R}^d$  such that  $y_i \mathbf{x}_i^\top \mathbf{w} > 0$  for  $i = 1, \dots, n$ .

Let  $\mathbf{w} \in \mathbb{R}^d$  be the parameter of a linear model. In *logistic regression*, we aim to minimize the following empirical risk

$$L(\mathbf{w}) := \sum_{i=1}^n \log(1 + \exp(-y_i \cdot \langle \mathbf{x}_i, \mathbf{w} \rangle)), \quad \mathbf{w} \in \mathbb{R}^d.$$

We study a sequence of iterates  $(\mathbf{w}_t)_{t \geq 0}$  produced by constant-stepsizes *gradient descent* (GD), where  $\mathbf{w}_0$  denotes the initialization and the remaining iterates are sequentially generated by:

$$\mathbf{w}_t = \mathbf{w}_{t-1} - \eta \cdot \nabla L(\mathbf{w}_{t-1}), \quad t \geq 1, \quad (\text{GD})$$

where  $\eta > 0$  is a constant stepsize. We are especially interested in a regime where  $\eta$  is very large such that  $L(\mathbf{w}_t)$  oscillates as a function of  $t$ . For the simplicity of presentation, we will assume that  $\mathbf{w}_0 = 0$ . Our results can be easily extended to allow general initialization.

The following notations are useful for presenting our results.

**Definition 1** (Margins and support vectors). Under Assumption 1, define the following notations:

(A) Let  $\gamma$  be the max- $\ell_2$ -margin (or max-margin in short), i.e.,

$$\gamma := \max_{\|\mathbf{w}\|_2=1} \min_{i \in [n]} y_i \cdot \langle \mathbf{x}_i, \mathbf{w} \rangle.$$

(B) Let  $\hat{\mathbf{w}}$  be the hard-margin support-vector-machine (SVM) solution, i.e.,

$$\hat{\mathbf{w}} := \arg \min_{\mathbf{w} \in \mathbb{R}^d} \|\mathbf{w}\|_2, \quad \text{s.t. } y_i \cdot \langle \mathbf{x}_i, \mathbf{w} \rangle \geq 1, \quad i = 1, \dots, n.$$

It is clear that  $\hat{\mathbf{w}}$  exists and is uniquely defined (see, e.g., Section 5.2 in Mohri et al. [2018]). Note that  $\|\hat{\mathbf{w}}\|_2 = \gamma$  and  $\hat{\mathbf{w}}/\|\hat{\mathbf{w}}\|_2$  is a max-margin direction. Also note that by duality,  $\hat{\mathbf{w}}$  can be written as (see, e.g., Section 5.2 in Mohri et al. [2018])

$$\hat{\mathbf{w}} = \sum_{i \in \mathcal{S}} \alpha_i \cdot y_i \mathbf{x}_i, \quad \alpha_i \geq 0.$$

(C) Let  $\mathcal{S}$  be the set of indexes of the support vectors, i.e.,

$$\mathcal{S} := \{i \in [n] : y_i \cdot \langle \mathbf{x}_i, \hat{\mathbf{w}}/\|\hat{\mathbf{w}}\|_2 \rangle = \gamma\}.$$

(D) If there exists non-support vector ( $\mathcal{S} \subsetneq [n]$ ), let  $\theta$  be the second smallest margin, i.e.,

$$\theta := \min_{i \notin \mathcal{S}} y_i \cdot \langle \mathbf{x}_i, \hat{\mathbf{w}}/\|\hat{\mathbf{w}}\|_2 \rangle.$$

It is clear from the definitions that  $\theta > \gamma > 0$ .

In addition to Assumption 1, we make the following two mild assumptions to facilitate our analysis.

**Assumption 2** (Regularity conditions). Assume that:

(A)  $\|\mathbf{x}_i\|_2 \leq 1$ ,  $i = 1, \dots, n$ .

(B)  $\text{rank}\{\mathbf{x}_i, i = 1, \dots, n\} = d$ .

Assumption 2 is only made for the convenience of presentation. In particular, Assumption 2(A) can be made true for any dataset by scaling the data vectors with a factor of  $\max_i \|\mathbf{x}_i\|_2$ . Without Assumption 2(B), our theorems still hold under a minor revision by replacing all the vectors of interests with their projections to  $\text{span}\{\mathbf{x}_i, i = 1, \dots, n\}$ .

**Assumption 3** (Non-degenerate data). *In addition to Assumption 1, assume that*

(A)  $\text{rank}\{\mathbf{x}_i, i \in \mathcal{S}\} = \text{rank}\{\mathbf{x}_i, i = 1, \dots, n\}$ .

(B) *There exist  $\alpha_i > 0, i \in \mathcal{S}$  such that  $\hat{\mathbf{w}} = \sum_{i \in \mathcal{S}} \alpha_i \cdot y_i \mathbf{x}_i$ .*

Note that (B) implies that  $\sum_{i \in \mathcal{S}} \alpha_i = 1$  since  $\gamma = \|\hat{\mathbf{w}}\|_2 = \sum_{i \in \mathcal{S}} \alpha_i \cdot y_i \mathbf{x}_i^\top \hat{\mathbf{w}} / \|\hat{\mathbf{w}}\|_2 = \sum_{i \in \mathcal{S}} \alpha_i \cdot \gamma$ .

Assumption 3 requires that the support vectors span the dataset and are associated with strictly positive dual variables. The requirements are weak since they hold *almost surely* for every linearly separable dataset sampled from a continuous distribution according to Appendix B in Soudry et al. [2018]. Assumption 3 provides convenience to our analysis, but we conjecture it might not be necessary. Removing/relaxing Assumption 3 is left as a future work.

### 3.1 Space Decomposition

Conceptually, our analysis is built on a novel space decomposition viewpoint, which relies on the following lemma.

**Lemma 3.1** (Non-separable subspace). *Suppose that Assumptions 1, 2, and 3 hold. Then  $(\mathbf{x}_i, y_i)_{i \in \mathcal{S}}$  is not linearly separable in the subspace orthogonal to the max-margin direction  $\hat{\mathbf{w}} / \|\hat{\mathbf{w}}\|_2$ . That is, for every  $\mathbf{v}$  such that  $\langle \mathbf{v}, \hat{\mathbf{w}} \rangle = 0$ , there exist  $i, j \in \mathcal{S}$  such that  $y_i \cdot \langle \mathbf{x}_i, \mathbf{v} \rangle < 0$ ,  $y_j \cdot \langle \mathbf{x}_j, \mathbf{v} \rangle > 0$ .*

*Proof of Lemma 3.1.* By Assumption 3 and  $\langle \mathbf{v}, \hat{\mathbf{w}} \rangle = 0$ , we have

$$0 = \langle \mathbf{v}, \hat{\mathbf{w}} \rangle = \sum_{i \in \mathcal{S}} \alpha_i \cdot y_i \mathbf{x}_i^\top \mathbf{v}.$$

By Assumptions 2 and 3 we have

$$\text{rank}\{y_i \mathbf{x}_i, i \in \mathcal{S}\} = \text{rank}\{\mathbf{x}_i, i \in \mathcal{S}\} = \text{rank}\{\mathbf{x}_i, i = 1, \dots, n\} = d,$$

so there must exist  $i \in \mathcal{S}$  such that  $y_i \mathbf{x}_i^\top \mathbf{v} \neq 0$ . Without loss of generality, assume that  $y_i \mathbf{x}_i^\top \mathbf{v} < 0$ .

Then since  $\alpha_i > 0$  for  $i \in \mathcal{S}$  by Assumption 3, there must exist  $j \in \mathcal{S}$  such that  $y_j \mathbf{x}_j^\top \mathbf{v} > 0$ .  $\square$

Lemma 3.1 shows that, although the dataset can be (linearly) separated by  $\hat{\mathbf{w}}$ , it cannot be separated by *any* vector orthogonal to  $\hat{\mathbf{w}}$ . This motivates us to decompose the  $d$ -dimensional ambient space into a 1-dimensional “separable” subspace and a  $(d - 1)$ -dimensional “non-separable” subspace. This idea is formally realized as follows.

Fix  $d - 1$  orthogonal vectors  $\mathbf{f}_1, \dots, \mathbf{f}_{d-1} \in \mathbb{R}^d$  such that  $(\hat{\mathbf{w}} / \|\hat{\mathbf{w}}\|_2, \mathbf{f}_1, \dots, \mathbf{f}_{d-1})$  forms an orthogonal basis of the ambient space  $\mathbb{R}^d$ . Then define two *projection operators*:

$$\begin{aligned} \mathcal{P}: \mathbb{R}^d &\rightarrow \mathbb{R} & \text{given by } \mathbf{v} &\mapsto \mathbf{v}^\top \hat{\mathbf{w}} / \|\hat{\mathbf{w}}\|_2, \\ \bar{\mathcal{P}}: \mathbb{R}^d &\rightarrow \mathbb{R}^{d-1} & \text{given by } \mathbf{v} &\mapsto (\mathbf{v}^\top \mathbf{f}_1, \dots, \mathbf{v}^\top \mathbf{f}_{d-1}). \end{aligned}$$

The two operators together define a natural space decomposition, i.e.,  $\mathbb{R}^d = \mathcal{P}(\mathbb{R}^d) \oplus \bar{\mathcal{P}}(\mathbb{R}^d)$ . Moreover,  $(\mathcal{P}(\mathbf{x}_i), y_i)_{i=1}^n$  are linearly separable with an max- $\ell_2$ -margin  $\gamma$  according to Definition 1, and  $(\bar{\mathcal{P}}(\mathbf{x}_i), y_i)_{i \in \mathcal{S}}$  (hence  $(\bar{\mathcal{P}}(\mathbf{x}_i), y_i)_{i=1}^n$ ) are non-separable according to Lemma 3.1. So the decomposition of space can also be understood as the decomposition of data features into “max-margin features” and “non-separable features”.

In what follows, we will call  $\mathcal{P}(\mathbb{R}^d)$  the *max-margin subspace* and  $\bar{\mathcal{P}}(\mathbb{R}^d)$  the *non-separable subspace*, respectively. In addition, we define a “margin offset” that quantifies to what extent the “non-separable features” are not separable.

**Definition 2** (Margin offset for the non-separable features). Under Assumptions 1, 2, and 3, it holds that  $(\bar{\mathcal{P}}(\mathbf{x}_i), y_i)_{i \in \mathcal{S}}$  is non-separable. Let  $b$  be a *margin offset* such that

$$-b := \max_{\bar{\mathbf{w}} \in \mathbb{R}^{d-1}, \|\bar{\mathbf{w}}\|_2=1} \min_{i \in \mathcal{S}} y_i \cdot \langle \bar{\mathcal{P}}(\mathbf{x}_i), \bar{\mathbf{w}} \rangle.$$

Then  $b > 0$  due to the non-separability. The definition immediately implies that:

$$\text{for every } \bar{\mathbf{v}} \in \mathbb{R}^{d-1}, \text{ there exists } i \in \mathcal{S} \text{ such that } y_i \cdot \langle \bar{\mathcal{P}}(\mathbf{x}_i), \bar{\mathbf{v}} \rangle \leq -b \cdot \|\bar{\mathbf{v}}\|_2.$$

188 **Comparison to Ji and Telgarsky [2018b].** The work by Ji and Telgarsky [2018b] also conducts  
189 space decomposition (see their Section 2). However, our approach is completely different from theirs.  
190 Firstly, they consider a non-separable dataset but we consider a linearly separable dataset. Secondly,  
191 at a higher level, they decompose the “dataset” (into two subsets), while we decompose the “features”  
192 (into two kinds of features). More specifically, Ji and Telgarsky [2018b] first group the non-separable  
193 dataset into the “maximal linearly separable subset” and the complement, non-separable subset, then  
194 decompose the ambient space according to the subspace spanned by the non-separable subset and its  
195 orthogonal complement. In comparison, we consider a linearly separable dataset and decompose the  
196 ambient space according to a max-margin direction (i.e.,  $\mathcal{P}$ ) and its orthogonal complement (i.e.,  $\bar{\mathcal{P}}$ ).

## 197 4 Main Results

198 We are now ready to present our main results. All proofs are deferred to Appendix C. To begin with,  
199 we provide the following theorem that captures the behaviors of constant-stepsize GD for logistic  
200 regression on linearly separable data.

201 **Theorem 4.1** (The implicit bias of GD for logistic regression). *Suppose that Assumptions 1, 2,*  
202 *and 3 hold. Consider  $(\mathbf{w}_t)_{t \geq 0}$  produced by (GD) with initialization<sup>2</sup>  $\mathbf{w}_0 = 0$  and constant stepsize*  
203  *$\eta > 0$ . Then there exist positive constants  $c_1, c_2, c_3 > 0$  that are upper bounded by a polynomial of*  
204  *$\{e^\eta, e^n, e^{1/b}, 1/\eta, 1/(\theta - \gamma), 1/\gamma, e^{\theta/\gamma}\}$  but are independent of  $t$ , such that:*

205 (A) *The risk is upper bounded by*

$$L(\mathbf{w}_t) \leq c_1/t, \quad t \geq 3.$$

206 (B) *In the max-margin subspace,*

$$\mathcal{P}(\mathbf{w}_t) \geq \log(t)/\gamma + \log(\eta\gamma^2/2)/\gamma, \quad t \geq 1.$$

207 (C) *In the non-separable subspace,*

$$\|\bar{\mathcal{P}}(\mathbf{w}_t)\|_2 \leq c_2, \quad t \geq 0.$$

208 (D) *In addition, in the non-separable subspace,*

$$G(\bar{\mathcal{P}}(\mathbf{w}_t)) - \min G(\cdot) \leq c_3/\log(t), \quad t \geq 3,$$

209 where  $G(\cdot)$  is a strongly convex potential defined by

$$G(\mathbf{v}) := \sum_{i \in S} \exp(-y_i \cdot \langle \bar{\mathcal{P}}(\mathbf{x}_i), \mathbf{v} \rangle), \quad \mathbf{v} \in \mathbb{R}^{d-1}.$$

210 Note that Theorem 4.1 applies to GD with *any* positive constant stepsize, therefore allowing GD to  
211 be in the EoS regime. We next discuss the implications of Theorem 4.1 in detail.

212 **Risk minimization.** Theorem 4.1(A) guarantees that the GD iterates minimize the logistic loss  
213 at a rate of  $\mathcal{O}(1/t)$  for any constant stepsize, even for those large stepsizes that cause local risk  
214 oscillations. This result explains the risk convergence of GD in the EoS regime, as illustrated in  
215 Figure 2, and is also consistent with the observations in neural network experiments (see Figure 1).

216 **Margin maximization.** Theorem 4.1(B) shows that the GD iterates, when projected to the max-  
217 margin direction, tend to infinity at a rate of  $\mathcal{O}(\log(t))$ . Moreover, Theorem 4.1(C) shows that the  
218 GD iterates, when projected to the non-separable subspace, are uniformly bounded. These two  
219 results together imply that the direction of the GD iterates will tend to a max-margin direction, i.e.,  
220 the hard-margin SVM direction, at a rate of  $\mathcal{O}(1/\log(t))$ . Therefore, the implicit bias of GD that  
221 maximizes the  $\ell_2$ -margin is consistent in both the EoS regime and the small-stepsize regime [Soudry  
222 et al., 2018, Ji and Telgarsky, 2018b].

223 **Iterate convergence in the non-separable subspace.** Theorem 4.1(D) shows that the GD iterates,  
224 when projected to the non-separable subspace, converge to the minimizer of a strongly convex  
225 potential  $G(\cdot)$ . Here,  $G(\cdot)$  measures the exponential loss of a parameter on the support vectors with  
226 their non-separable features. This provides a more precise characterization of the implicit bias of GD:  
227 the direction of the GD iterates converges to the hard-margin SVM direction, moreover, the limit of

<sup>2</sup>The theorem can be easily extended to allow any  $\mathbf{w}_0$  that has a bounded  $\ell_2$ -norm.

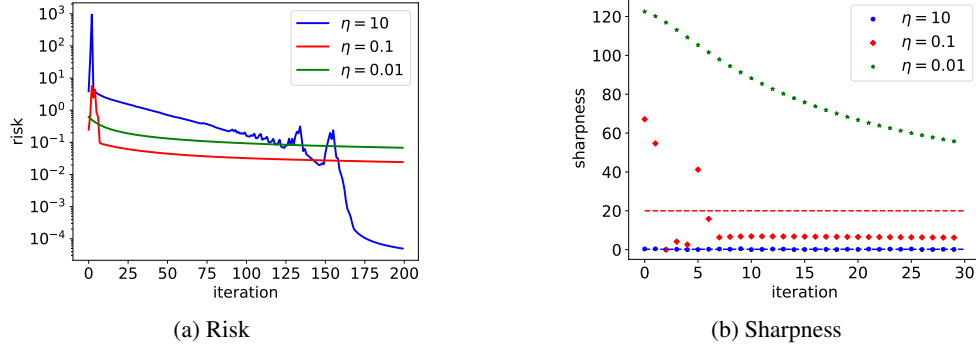

Figure 2: The behaviors of GD for logistic regression. We randomly sample 1,000 data with labels “0” and “8” from the MNIST dataset and then use GD to perform logistic regression on those data. The sub-figures (a) and (b) report the risk (i.e., the logistic loss) and sharpness (i.e.,  $\|\nabla L(\mathbf{w}_t)\|_2$ ) along the GD trajectories, respectively. The blue and red curves correspond to GD with large stepsizes  $\eta = 10$  and  $\eta = 0.1$ , respectively, where the training losses oscillate locally and the sharpnesses can exceed  $2/\eta = 0.2$  and  $2/\eta = 20$ , respectively. The green curves correspond to GD with a small stepsize  $\eta = 0.01$ , where the training losses decrease monotonically and the sharpnesses are always below  $2/\eta = 200$ . More details of the experiments can be found in Appendix D.

the projections of the GD iterates to the orthogonal complement to the hard-margin SVM direction minimizes the exponential loss on the non-separable features of the support vectors.

**Comparison to Theorem 9 in Soudry et al. [2018].** Theorem 9, in particular, equation (18), in Soudry et al. [2018] indirectly characterizes the convergence of GD iterates in the non-separable subspace. It reads in our notations that:  $\tilde{\mathbf{w}} := \lim_{t \rightarrow \infty} (\mathbf{w}_t - \tilde{\mathbf{w}} \log(t))$  exists and satisfies

$$\text{for every } i \in \mathcal{S}, \quad \eta \cdot \exp(-y_i \cdot \langle \mathbf{x}_i, \tilde{\mathbf{w}} \rangle) = \alpha_i, \text{ where } \alpha_i \text{ is defined in Assumption 3.} \quad (1)$$

In Appendix A, we show that Theorem 4.1(D) is equivalent to condition (1) in terms of describing  $\bar{\mathcal{P}}(\mathbf{w}_\infty)$ . Despite their equivalence, (1) is less interpretable than Theorem 4.1(D), as (1) entangles an effect of  $\mathcal{P}(\mathbf{w}_\infty)$  with  $\bar{\mathcal{P}}(\mathbf{w}_\infty)$ , while Theorem 4.1 completely decouples  $\mathcal{P}(\mathbf{w}_\infty)$  and  $\bar{\mathcal{P}}(\mathbf{w}_\infty)$ . In particular, (1) seems to suggest  $\bar{\mathcal{P}}(\mathbf{w}_\infty)$  to be a function of stepsize  $\eta$  since  $\tilde{\mathbf{w}}$  depends on  $\eta$ . However, this is only an illusion brought by the lack of interpretability of (1); it is clear that  $\bar{\mathcal{P}}(\mathbf{w}_\infty)$  is independent of  $\eta$  according to Theorem 4.1(D).

**Exponential loss.** Until now, our theory for GD is consistent for large and small stepsizes. However, this is a particular benefit thanks to the design of the logistic loss, and may not hold for other losses. Our next result suggests that, in the EoS regime where the stepsizes are large, GD can diverge catastrophically under the exponential loss.

**Theorem 4.2** (The catastrophic divergence of GD under the exponential loss). *Consider a dataset of two samples, where*

$$\mathbf{x}_1 = (\gamma, 1), \quad y_1 = 1; \quad \mathbf{x}_2 = (\gamma, -1), \quad y_2 = 1.$$

*It is clear that  $(\mathbf{x}_i, y_i)_{i=1,2}$  is linearly separable and  $(1, 0)$  is the max-margin direction. Consider a risk defined by the exponential loss:*

$$L(w, \bar{w}) := \exp(-y_1 \langle \mathbf{x}_1, \mathbf{w} \rangle) + \exp(-y_2 \langle \mathbf{x}_2, \mathbf{w} \rangle) = e^{-\gamma w} \cdot (e^{-\bar{w}} + e^{\bar{w}}), \quad \text{where } \mathbf{w} = (w, \bar{w}).$$

*Let  $(w_t, \bar{w}_t)_{t \geq 0}$  be the iterates produced by GD with constant stepsize  $\eta$  for optimizing  $L(w, \bar{w})$ . If*

$$0 \leq w_0 \leq 2, \quad |\bar{w}_0| \geq 1, \quad 0 < \gamma < 1/4, \quad \eta \geq 4,$$

*then:*

- (A)  $L(w_t, \bar{w}_t) \rightarrow \infty$ .
- (B)  $w_t \rightarrow \infty$ .
- (C) For every  $t \geq 0$ ,  $|\bar{w}_t| \geq 2\gamma w_t$ .
- (D) Moreover, the sign of  $\bar{w}_t$  flips every iteration.

*As a consequence,  $(w_t, \bar{w}_t)_{t \geq 0}$  diverge in terms of either magnitude or direction; in particular, the direction of  $(w_t, \bar{w}_t)_{t \geq 0}$  cannot converge to the max-margin direction (which is  $(1, 0)$ ).*

Theorem 4.2 shows that with a large constant stepsize, the GD iterates no longer minimize the risk defined by the exponential loss and no longer converge along the max-margin direction. In fact, the directions of the GD iterates flip every step, thus the direction of the GD iterates necessarily *diverges*, resulting in no meaningful implicit bias at all.

In the EoS regime, large-stepsize GD still behaves nicely under the logistic loss (Theorem 4.1) but can behave catastrophically under the exponential loss (Theorem 4.2). From a mathematical standpoint, this difference is rooted in the fact that the gradient of the logistic loss is uniformly bounded while the gradient of the exponential loss could be extremely large. From a practical standpoint, it provides insights into why the logistics loss (and its multi-class version, the cross-entropy loss) is preferable to the exponential loss in practice.

The different behaviors of large-stepsize GD under the logistic and exponential losses also sharply contrast the EoS regime with the small-stepsize regime. Because in the small-stepsize regime, the convergence and implicit bias of GD are known to be similar under any exponentially-tailed losses, including the logistic and exponential losses [Soudry et al., 2018, Ji and Telgarsky, 2018b].

## 5 Techniques Overview

The proofs of Theorems 4.1 and 4.2 are deferred to Appendix C. In this section, we explain the proof ideas of Theorem 4.1 by analyzing a simple dataset considered in Theorem 4.2 (the treatment to the general datasets can be found in Appendix B). But this time we work with the logistic loss instead of the exponential loss, that is,

$$L(w, \bar{w}) = \log(1 + e^{-\gamma w - \bar{w}}) + \log(1 + e^{-\gamma w + \bar{w}}).$$

Then the GD iterates can be written as

$$w_{t+1} = w_t - \eta \cdot g_t, \quad \bar{w}_{t+1} = \bar{w}_t - \eta \cdot \bar{g}_t,$$

where

$$g_t := -\gamma \cdot \left( \frac{1}{1 + e^{\gamma w_t + \bar{w}_t}} + \frac{1}{1 + e^{\gamma w_t - \bar{w}_t}} \right), \quad \bar{g}_t := -\left( \frac{1}{1 + e^{\gamma w_t + \bar{w}_t}} - \frac{1}{1 + e^{\gamma w_t - \bar{w}_t}} \right).$$

For simplicity, assume that

$$w_0 = 0, \quad |\bar{w}_0| > 0.$$

Different from Soudry et al. [2018], Ji and Telgarsky [2018b], our approach begins with showing the implicit bias (despite that the risk may oscillate). The long-term risk convergence is then simply a consequence of the implicit bias results.

**Step 1:  $(\bar{w}_t)_{t \geq 0}$  is uniformly bounded.** Observe that  $\bar{g}_t$  and  $\bar{w}_t$  always share the same sign and that  $|\bar{g}_t| \leq 1$ , so we have

$$|\bar{w}_{t+1}| = |\bar{w}_t - \eta \cdot \bar{g}_t| \leq \max\{|\bar{w}_t|, \eta \cdot |\bar{g}_t|\} \leq \max\{|\bar{w}_t|, \eta\}.$$

By induction, we get that  $(|\bar{w}_t|)_{t \geq 0}$  is uniformly bounded by  $\max\{|\bar{w}_0|, \eta\} = \Theta(1)$ .

**Step 2:  $w_t \approx \log(t)/\gamma$ .** We turn to study the max-margin subspace. It is clear that  $g_t \leq 0$  for every  $t \geq 0$ . So we have  $w_t \geq 0$  by induction. Moreover, we have

$$-\frac{g_t}{\gamma} = \frac{e^{-\gamma w_t - \bar{w}_t}}{1 + e^{-\gamma w_t - \bar{w}_t}} + \frac{e^{-\gamma w_t + \bar{w}_t}}{1 + e^{-\gamma w_t + \bar{w}_t}} \leq e^{-\gamma w_t} \cdot e^{-\bar{w}_t} + e^{-\gamma w_t} \cdot e^{\bar{w}_t} \leq e^{-\gamma w_t} \cdot \Theta(1),$$

where the last inequality is because  $|\bar{w}_t|$  is uniformly bounded. We also have

$$\begin{aligned} -\frac{g_t}{\gamma} &= \frac{e^{-\gamma w_t - \bar{w}_t}}{1 + e^{-\gamma w_t - \bar{w}_t}} + \frac{e^{-\gamma w_t + \bar{w}_t}}{1 + e^{-\gamma w_t + \bar{w}_t}} \geq 0.5 \cdot \min\{1, e^{-\gamma w_t} e^{-\bar{w}_t}\} + 0.5 \cdot \min\{1, e^{-\gamma w_t} e^{\bar{w}_t}\} \\ &\geq 0.5 \cdot \min\{1, e^{-\gamma w_t} e^{-\bar{w}_t} + e^{-\gamma w_t} e^{\bar{w}_t}\} \geq 0.5 \cdot \min\{1, e^{-\gamma w_t}\} = 0.5 \cdot e^{-\gamma w_t}, \end{aligned}$$

where the third inequality is because  $e^{-\bar{w}_t} + e^{\bar{w}_t} \geq 1$  and the last equality is because  $w_t \geq 0$ . Putting these together, we have

$$g_t \approx -\gamma \cdot e^{-\gamma w_t} \cdot \Theta(1) \Rightarrow w_{t+1} \approx w_t - \eta \gamma \cdot e^{-\gamma w_t} \cdot \Theta(1) \Rightarrow w_t = \log(t)/\gamma \pm \Theta(1). \quad (2)$$



288 **Step 3:**  $\bar{g}_t \approx \exp(-\gamma w_t) \cdot \nabla G(\bar{w}_t)$ . We turn back to the non-separable subspace. Note that  $\bar{g}_t$  is  
 289 an odd function of  $\bar{w}_t$ . Without loss of generality, let us assume  $\bar{w}_t \geq 0$  in this part. Notice that

$$\text{for every fixed } a > 1, f(t) := \frac{1}{t+1/a} - \frac{1}{t+a} \text{ is a decreasing function of } t \geq 0. \quad (3)$$

290 Then we have

$$\bar{g}_t = e^{-\gamma w_t} \cdot \left( \frac{1}{e^{-\gamma w_t} + e^{-\bar{w}_t}} - \frac{1}{e^{-\gamma w_t} + e^{\bar{w}_t}} \right) \leq e^{-\gamma w_t} \cdot \left( \frac{1}{e^{-\bar{w}_t}} - \frac{1}{e^{\bar{w}_t}} \right) =: e^{-\gamma w_t} \cdot \nabla G(\bar{w}_t),$$

291 where the inequality is by (3), and  $G(\bar{w}) := e^{\bar{w}} + e^{-\bar{w}}$  is defined as in Theorem 4.1(D). On the other  
 292 hand, since  $|\bar{w}_t|$  is bounded and  $w_t$  is increasing (and tends to infinity), there must exist a time  $t_0$   
 293 such that  $e^{-\gamma w_t} \leq e^{-|\bar{w}_t|}$  for every  $t \geq t_0$ . Then for  $t \geq t_0$  we have

$$\begin{aligned} \bar{g}_t &= e^{-\gamma w_t} \cdot \left( \frac{1}{e^{-\gamma w_t} + e^{-\bar{w}_t}} - \frac{1}{e^{-\gamma w_t} + e^{\bar{w}_t}} \right) \geq e^{-\gamma w_t} \cdot \left( \frac{1}{2e^{-\bar{w}_t}} - \frac{1}{e^{-\bar{w}_t} + e^{\bar{w}_t}} \right) \\ &= e^{-\gamma w_t} \cdot \frac{e^{\bar{w}_t} - e^{-\bar{w}_t}}{2e^{-2\bar{w}_t} + 2} \geq e^{-\gamma w_t} \cdot \frac{e^{\bar{w}_t} - e^{-\bar{w}_t}}{4} =: \frac{1}{4} \cdot e^{-\gamma w_t} \cdot \nabla G(\bar{w}_t), \end{aligned}$$

294 where the first inequality is by (3) and  $e^{-\gamma w_t} \leq e^{-\bar{w}_t}$ , and the last inequality is because we assume  
 295  $\bar{w}_t \geq 0$ . Putting these together, and using (2), we obtain that

$$\text{for every } t \geq t_0, \quad \bar{w}_{t+1} = \bar{w}_t - \eta_t \cdot \nabla G(\bar{w}_t), \text{ where } \eta_t \approx \eta \cdot e^{-\gamma w_t} \cdot \Theta(1) \approx \Theta(1)/t. \quad (4)$$

296 **Step 4: a modified descent lemma.** Using (4) and Taylor's expansion, we have

$$\text{for every } t \geq t_0, \quad G(\bar{w}_{t+1}) \leq G(\bar{w}_t) - \eta_t \cdot \|\nabla G(\bar{w}_t)\|^2 + \frac{\beta}{2} \cdot \eta_t^2 \cdot \|\nabla G(\bar{w}_t)\|^2 \leq G(\bar{w}_t) + \frac{\Theta(1)}{t^2},$$

297 where  $\beta := \sup_{|\bar{v}| \leq \max\{|\bar{w}_0|, \eta\}} \|\nabla^2 G(\bar{v})\|_2 = \Theta(1)$ . Taking a telescoping sum from  $t$  to  $T$ , we have  
 for every  $T \geq t \geq t_0$ ,  $G(\bar{w}_T) \leq G(\bar{w}_t) + \Theta(1)/t$ . (5)

298 **Step 5: the convergence of  $\bar{w}_t$ .** What remains is adapted from classic convergence arguments.  
 299 Choose  $\bar{w}_* = \arg \min G(\cdot)$ , then

$$\begin{aligned} \|\bar{w}_{t+1} - \bar{w}_*\|_2^2 &= \|\bar{w}_t - \bar{w}_*\|_2^2 - 2\eta_t \cdot \langle \bar{w}_t - \bar{w}_*, G(\bar{w}_t) \rangle + \eta_t^2 \cdot \|\nabla G(\bar{w}_t)\|_2^2 \\ &\leq \|\bar{w}_t - \bar{w}_*\|_2^2 - 2\eta_t \cdot (G(\bar{w}_t) - G(\bar{w}_*)) + \Theta(1)/t^2, \quad t \geq t_0, \end{aligned}$$

300 where the equality is by (4), and the inequality is because of the convexity of  $G(\cdot)$ ,  $|\bar{w}_t| \leq \Theta(1)$ , and  
 301 (4). Taking a telescoping sum, we have

$$\sum_{t=t_0}^T 2\eta_t \cdot (G(\bar{w}_t) - G(\bar{w}_*)) \leq \|\bar{w}_{t_0} - \bar{w}_*\|_2^2 - \|\bar{w}_{T+1} - \bar{w}_*\|_2^2 + \sum_{t=t_0}^T \Theta(1)/t^2 \leq \Theta(1).$$

302 Combing the above with (5) and using  $\eta_t \approx \Theta(1)/t$  from (4), we get

$$\sum_{t=t_0}^T \eta_t \cdot (G(\bar{w}_T) - G(\bar{w}_*)) \leq \sum_{t=t_0}^T \eta_t \cdot (G(\bar{w}_t) - G(\bar{w}_*)) + \sum_{t=t_0}^T \eta_t \cdot \Theta(1)/t \leq \Theta(1).$$

303 Finally, since  $\sum_{t=t_0}^T \eta_t \geq \Theta(1) \cdot (\log(T) - \log(t_0))$  according to (4), we get that  $G(\bar{w}_T) - G(\bar{w}_*) \leq$   
 304  $\Theta(1)/(\log(T) - \log(t_0))$ .

305 **Step 6: risk convergence.** The long-term risk convergence result can be easily established by  
 306 making use of the implicit bias results we have obtained so far.

## 307 6 Conclusion

308 We consider constant-stepsizes GD for logistic regression on linearly separable data. We show that  
 309 with *any* constant stepsize, GD minimizes the logistic loss; moreover, the GD iterates tend to infinity  
 310 when projected to a max-margin direction and tend to a fixed minimizer of a strongly convex potential  
 311 when projected to the orthogonal complement of the max-margin direction. We also show that GD  
 312 with a large stepsize may diverge catastrophically if the logistic loss is replaced by the exponential  
 313 loss. Our theory explains how GD minimizes a risk non-monotonically.

## References

- Kwangjun Ahn, Sébastien Bubeck, Sinho Chewi, Yin Tat Lee, Felipe Suarez, and Yi Zhang. Learning threshold neurons via the "edge of stability". *arXiv preprint arXiv:2212.07469*, 2022a.
- Kwangjun Ahn, Jingzhao Zhang, and Suvrit Sra. Understanding the unstable convergence of gradient descent. In *International Conference on Machine Learning*, pages 247–257. PMLR, 2022b.
- Sanjeev Arora, Zhiyuan Li, and Abhishek Panigrahi. Understanding gradient descent on the edge of stability in deep learning. In *International Conference on Machine Learning*, pages 948–1024. PMLR, 2022.
- Peter L Bartlett, Dylan J Foster, and Matus J Telgarsky. Spectrally-normalized margin bounds for neural networks. *Advances in neural information processing systems*, 30, 2017.
- Peter L Bartlett, Philip M Long, and Olivier Bousquet. The dynamics of sharpness-aware minimization: Bouncing across ravines and drifting towards wide minima. *arXiv preprint arXiv:2210.01513*, 2022.
- Lei Chen and Joan Bruna. On gradient descent convergence beyond the edge of stability. *arXiv preprint arXiv:2206.04172*, 2022.
- Jeremy M Cohen, Simran Kaur, Yuanzhi Li, J Zico Kolter, and Ameet Talwalkar. Gradient descent on neural networks typically occurs at the edge of stability. *arXiv preprint arXiv:2103.00065*, 2021.
- Alex Damian, Eshaan Nichani, and Jason D Lee. Self-stabilization: The implicit bias of gradient descent at the edge of stability. *arXiv preprint arXiv:2209.15594*, 2022.
- Priya Goyal, Piotr Dollár, Ross Girshick, Pieter Noordhuis, Lukasz Wesolowski, Aapo Kyrola, Andrew Tulloch, Yangqing Jia, and Kaiming He. Accurate, large minibatch sgd: Training imagenet in 1 hour. *arXiv preprint arXiv:1706.02677*, 2017.
- Suriya Gunasekar, Blake E Woodworth, Srinadh Bhojanapalli, Behnam Neyshabur, and Nati Srebro. Implicit regularization in matrix factorization. *Advances in Neural Information Processing Systems*, 30, 2017.
- Suriya Gunasekar, Jason Lee, Daniel Soudry, and Nathan Srebro. Characterizing implicit bias in terms of optimization geometry. In *International Conference on Machine Learning*, pages 1832–1841. PMLR, 2018a.
- Suriya Gunasekar, Jason D Lee, Daniel Soudry, and Nati Srebro. Implicit bias of gradient descent on linear convolutional networks. *Advances in neural information processing systems*, 31, 2018b.
- Ziwei Ji and Matus Telgarsky. Gradient descent aligns the layers of deep linear networks. *arXiv preprint arXiv:1810.02032*, 2018a.
- Ziwei Ji and Matus Telgarsky. Risk and parameter convergence of logistic regression. *arXiv preprint arXiv:1803.07300*, 2018b.
- Ziwei Ji, Nathan Srebro, and Matus Telgarsky. Fast margin maximization via dual acceleration. In *International Conference on Machine Learning*, pages 4860–4869. PMLR, 2021.
- Guanghui Lan. *First-order and stochastic optimization methods for machine learning*, volume 1. Springer, 2020.
- Aitor Lewkowycz, Yasaman Bahri, Ethan Dyer, Jascha Sohl-Dickstein, and Guy Gur-Ari. The large learning rate phase of deep learning: the catapult mechanism. *arXiv preprint arXiv:2003.02218*, 2020.
- Zhouzi Li, Zixuan Wang, and Jian Li. Analyzing sharpness along gd trajectory: Progressive sharpening and edge of stability. *arXiv preprint arXiv:2207.12678*, 2022.
- Kaifeng Lyu and Jian Li. Gradient descent maximizes the margin of homogeneous neural networks. *arXiv preprint arXiv:1906.05890*, 2019.

359 Kaifeng Lyu, Zhiyuan Li, and Sanjeev Arora. Understanding the generalization benefit of normaliza-  
360 tion layers: Sharpness reduction. *arXiv preprint arXiv:2206.07085*, 2022.

361 Chao Ma, Daniel Kunin, Lei Wu, and Lexing Ying. Beyond the quadratic approximation: the  
362 multiscale structure of neural network loss landscapes. *arXiv preprint arXiv:2204.11326*, 2022.

363 Mehryar Mohri, Afshin Rostamizadeh, and Ameet Talwalkar. *Foundations of machine learning*. MIT  
364 press, 2018.

365 Mor Shpigel Nacson, Suriya Gunasekar, Jason Lee, Nathan Srebro, and Daniel Soudry. Lexicographic  
366 and depth-sensitive margins in homogeneous and non-homogeneous deep models. In *International*  
367 *Conference on Machine Learning*, pages 4683–4692. PMLR, 2019a.

368 Mor Shpigel Nacson, Jason Lee, Suriya Gunasekar, Pedro Henrique Pamplona Savarese, Nathan  
369 Srebro, and Daniel Soudry. Convergence of gradient descent on separable data. In *The 22nd*  
370 *International Conference on Artificial Intelligence and Statistics*, pages 3420–3428. PMLR, 2019b.

371 Mor Shpigel Nacson, Nathan Srebro, and Daniel Soudry. Stochastic gradient descent on separable  
372 data: Exact convergence with a fixed learning rate. In *The 22nd International Conference on*  
373 *Artificial Intelligence and Statistics*, pages 3051–3059. PMLR, 2019c.

374 Yurii Nesterov et al. *Lectures on convex optimization*, volume 137. Springer, 2018.

375 Behnam Neyshabur, Srinadh Bhojanapalli, and Nathan Srebro. A pac-bayesian approach to spectrally-  
376 normalized margin bounds for neural networks. *arXiv preprint arXiv:1707.09564*, 2017.

377 Daniel Soudry, Elad Hoffer, Mor Shpigel Nacson, Suriya Gunasekar, and Nathan Srebro. The implicit  
378 bias of gradient descent on separable data. *The Journal of Machine Learning Research*, 19(1):  
379 2822–2878, 2018.

380 Lei Wu, Chao Ma, et al. How sgd selects the global minima in over-parameterized learning: A  
381 dynamical stability perspective. *Advances in Neural Information Processing Systems*, 31, 2018.

382 Chen Xing, Devansh Arpit, Christos Tsirigotis, and Yoshua Bengio. A walk with sgd. *arXiv preprint*  
383 *arXiv:1802.08770*, 2018.

384 Xingyu Zhu, Zixuan Wang, Xiang Wang, Mo Zhou, and Rong Ge. Understanding edge-of-stability  
385 training dynamics with a minimalist example. *arXiv preprint arXiv:2210.03294*, 2022.

## 386 A On the Equivalence between Theorem 4.1(D) and (1)

387 Note that  $\tilde{\mathbf{w}}$  in (1) contains components in both the max-margin and non-separable subspaces, and  
 388 we need to disentangle those two components.

389 Under the coordinate system that defines  $\mathcal{P}$  and  $\bar{\mathcal{P}}$ , we can represent a vector  $\mathbf{v} \in \mathbb{R}^d$  as

$$\mathbf{v} := (\mathcal{P}(\mathbf{v}), \bar{\mathcal{P}}(\mathbf{v})).$$

390 Then for  $i \in \mathcal{S}$ , we have

$$\begin{aligned} y_i \cdot \langle \mathbf{x}_i, \tilde{\mathbf{w}} \rangle &= y_i \cdot \langle (\mathcal{P}(\mathbf{x}_i), \bar{\mathcal{P}}(\mathbf{x}_i)), (\mathcal{P}(\tilde{\mathbf{w}}), \bar{\mathcal{P}}(\tilde{\mathbf{w}})) \rangle \\ &= y_i \cdot \mathcal{P}(\mathbf{x}_i) \cdot \mathcal{P}(\tilde{\mathbf{w}}) + y_i \cdot \langle \bar{\mathcal{P}}(\mathbf{x}_i), \bar{\mathcal{P}}(\tilde{\mathbf{w}}) \rangle && \text{since } \mathcal{P} \text{ and } \bar{\mathcal{P}} \text{ are orthogonal} \\ &= \gamma \mathcal{P}(\tilde{\mathbf{w}}) + y_i \cdot \langle \bar{\mathcal{P}}(\mathbf{x}_i), \bar{\mathcal{P}}(\tilde{\mathbf{w}}) \rangle. && \text{since } y_i \mathcal{P}(\mathbf{x}_i) = \gamma \text{ for } i \in \mathcal{S} \end{aligned}$$

391 So (1) is equivalent to

$$\text{for every } i \in \mathcal{S}, \quad \eta \exp(-\gamma \bar{\mathcal{P}}(\tilde{\mathbf{w}})) \cdot \exp(-y_i \cdot \langle \bar{\mathcal{P}}(\mathbf{x}_i), \bar{\mathcal{P}}(\tilde{\mathbf{w}}) \rangle) = \alpha_i.$$

392 Recall that  $\sum_{i \in \mathcal{S}} \alpha_i = 1$  according to Assumption 3(B). So focusing on  $\bar{\mathcal{P}}$ , the above is equivalent  
 393 to the following condition on  $\bar{\mathcal{P}}(\tilde{\mathbf{w}})$ :

$$\alpha_i \propto \exp(-y_i \cdot \langle \bar{\mathcal{P}}(\mathbf{x}_i), \bar{\mathcal{P}}(\tilde{\mathbf{w}}) \rangle), \quad i \in \mathcal{S}. \quad (6)$$

394 Here we ignore a shared normalization factor.

395 Now, recall from Assumption 3(B) that  $(\alpha_i)_{i \in \mathcal{S}}$  are such that

$$\hat{\mathbf{w}} = \sum_{i \in \mathcal{S}} \alpha_i \cdot y_i \mathbf{x}_i.$$

396 Note that as long as  $\sum_{i \in \mathcal{S}} \alpha_i = 1$ , we have  $\mathcal{P}(\hat{\mathbf{w}}) = \sum_{i \in \mathcal{S}} \alpha_i \cdot y_i \mathcal{P}(\mathbf{x}_i) = \gamma$  by Assumption 3.  
 397 Now consider  $\bar{\mathcal{P}}$ . Note that  $\bar{\mathcal{P}}(\hat{\mathbf{w}}) = 0$  by the choice of  $\bar{\mathcal{P}}$ , then apply  $\bar{\mathcal{P}}$  on both sides of the above  
 398 equation, we get

$$0 = \bar{\mathcal{P}}(\hat{\mathbf{w}}) = \sum_{i \in \mathcal{S}} \alpha_i \cdot y_i \bar{\mathcal{P}}(\mathbf{x}_i). \quad (7)$$

399 Under (7), (6) is equivalent to the following condition on  $\bar{\mathcal{P}}(\tilde{\mathbf{w}})$ :

$$0 = \sum_{i \in \mathcal{S}} \exp(-y_i \cdot \langle \bar{\mathcal{P}}(\mathbf{x}_i), \bar{\mathcal{P}}(\tilde{\mathbf{w}}) \rangle) \cdot y_i \bar{\mathcal{P}}(\mathbf{x}_i),$$

400 which is precisely the first-order condition of

$$\bar{\mathcal{P}}(\tilde{\mathbf{w}}) \in \arg \min G(\cdot), \text{ where } G(\mathbf{v}) := \sum_{i \in \mathcal{S}} \exp(-y_i \cdot \langle \bar{\mathcal{P}}(\mathbf{x}_i), \mathbf{v} \rangle).$$

401 Hence we have shown that: the condition that  $\tilde{\mathbf{w}}$  satisfies (1) is equivalent to the condition that  $\bar{\mathcal{P}}(\tilde{\mathbf{w}})$   
 402 minimizes the strongly convex potential  $G(\cdot)$ .

## 403 B The Behaviors of Constant-Stepsize GD

### 404 B.1 Notation Simplifications

405 Without loss of generality, we assume that

$$y_i = 1, \quad i = 1, \dots, n.$$

406 Otherwise, we replace  $y_i$  with 1 and  $\mathbf{x}_i$  with  $y_i \cdot \mathbf{x}_i$ , respectively, and the following analysis does not  
407 change.

408 Then the risk becomes

$$L(\mathbf{w}) := \sum_{i=1}^n \log(1 + e^{-\mathbf{w}^\top \mathbf{x}_i}).$$

409 **Rotating the hard-margin SVM solution.** Note that the (GD) iterates (under linear models) are  
410 rotation equivariant. Specifically, let  $\mathbf{R}$  be an orthogonal matrix, then applying  $\mathbf{R}$  on both sides of  
411 (GD), we obtain

$$\begin{aligned} \mathbf{R}\mathbf{w}_{t+1} &= \mathbf{R}\mathbf{w}_t + \eta \sum_{i=1}^n (1 - s(\mathbf{x}_i^\top \mathbf{w}_t)) \cdot \mathbf{R}\mathbf{x}_i \\ &= \mathbf{R}\mathbf{w}_t + \eta \sum_{i=1}^n (1 - s((\mathbf{R}\mathbf{x}_i)^\top (\mathbf{R}\mathbf{w}_t))) \cdot \mathbf{R}\mathbf{x}_i, \end{aligned}$$

412 which is equivalent to the GD iterates under changes of variables,  $\mathbf{w} \leftarrow \mathbf{R}\mathbf{w}$  and  $\mathbf{x} \leftarrow \mathbf{R}\mathbf{x}$ .

413 Therefore, without loss of generality, we can apply a rotation to the dataset such that  $\hat{\mathbf{w}} \parallel \mathbf{e}_1$ . Then  
414 for  $\mathbf{v} \in \mathbb{R}^d$ ,

$$\mathcal{P}\mathbf{v} = \mathbf{v}[1] \in \mathbb{R}, \quad \bar{\mathcal{P}}\mathbf{v} = \mathbf{v}[2:d] \in \mathbb{R}^{d-1}.$$

415 Slightly abusing notations, in what follows we will write

$$\mathbf{x}_i = (x_i, \bar{\mathbf{x}}_i)^\top \in \mathbb{R} \oplus \mathbb{R}^{d-1}, \quad i = 1, \dots, n,$$

416 where

$$x_i := \mathbf{x}_i[1] \in \mathbb{R}, \quad \bar{\mathbf{x}}_i := \mathbf{x}_i[2:d] \in \mathbb{R}^{d-1}.$$

417 Similarly, we define

$$\mathbf{w} = (w, \bar{\mathbf{w}})^\top \in \mathbb{R} \oplus \mathbb{R}^{d-1}.$$

418 Then we have

$$\mathbf{x}_i^\top \mathbf{w} = x_i w_i + \bar{\mathbf{x}}_i^\top \bar{\mathbf{w}}.$$

419 So the loss can be written as:

$$L(w, \bar{\mathbf{w}}) := \sum_{i=1}^n \log(1 + e^{-wx_i - \bar{\mathbf{w}}^\top \bar{\mathbf{x}}_i}).$$

420 So (GD) can be written as:

$$\begin{aligned} w_0 &= 0, & w_t &= w_{t-1} - \eta \cdot \nabla_w L(w_{t-1}, \bar{\mathbf{w}}_{t-1}), & t &\geq 1; \\ \bar{\mathbf{w}}_0 &= 0, & \bar{\mathbf{w}}_t &= \bar{\mathbf{w}}_{t-1} - \eta \cdot \nabla_{\bar{\mathbf{w}}} L(w_{t-1}, \bar{\mathbf{w}}_{t-1}), & t &\geq 1. \end{aligned} \tag{8}$$

421 The above two recursions capture the GD iterates projecting to the max-margin and non-separable  
422 subspaces, respectively.

## 423 B.2 Boundedness of GD in the Non-Separable Subspace

424 We first show that  $(\bar{\mathbf{w}}_t)_{t \geq 0}$  stay bounded for every fixed stepsize  $\eta$ .

425 **Lemma B.1** (Positiveness of  $w_t$ ). *Suppose that Assumption 1 holds. Consider  $(w_t)_{t \geq 0}$  defined by (8)*  
 426 *with constant stepsize  $\eta > 0$ . Then for every  $t \geq 0$ , it holds that  $w_t \geq 0$ .*

427 *Proof.* Recall that

$$w_0 = 0, \quad w_t = w_{t-1} - \eta \cdot \nabla_w L(w_{t-1}, \bar{\mathbf{w}}_{t-1}), \quad t \geq 1.$$

428 We only need to show that  $\nabla_w L(w, \bar{\mathbf{w}}) \leq 0$ . This is because

$$\begin{aligned} \nabla_w L(w, \bar{\mathbf{w}}) &= - \sum_{i=1}^n \frac{1}{1 + e^{w x_i + \bar{\mathbf{w}}^\top \bar{\mathbf{x}}_i}} \cdot x_i \\ &< 0. \end{aligned} \quad \text{since } x_i \geq \gamma > 0 \text{ by Definition 1}$$

429

□

430 **Lemma B.2** (A recursion of  $\|\bar{\mathbf{w}}_t\|_2$ ). *Suppose that Assumptions 1, 2, and 3 hold. Consider  $(\bar{\mathbf{w}}_t)_{t \geq 0}$*   
 431 *defined by (8) with constant stepsize  $\eta > 0$ . Then for every  $t \geq 0$ , there exists  $j \in [n]$  such that*

$$\|\bar{\mathbf{w}}_{t+1}\|_2^2 \leq \|\bar{\mathbf{w}}_t\|_2^2 + 2\eta e^{-w_t \gamma} \cdot \left( n - \frac{b \cdot \|\bar{\mathbf{w}}_t\|_2}{4} \right) + \frac{\eta}{1 + e^{w_t x_j + \bar{\mathbf{w}}_t^\top \bar{\mathbf{x}}_j}} \cdot (\eta n^2 - b \cdot \|\bar{\mathbf{w}}_t\|_2).$$

432 As a direct consequence,

$$\|\bar{\mathbf{w}}_t\|_2 \geq \max\{4n/b, \eta n^2/b\} \quad \text{implies that} \quad \|\bar{\mathbf{w}}_{t+1}\|_2 \leq \|\bar{\mathbf{w}}_t\|_2.$$

433 *Proof.* We first make a few useful notations. Fix a time index  $t$ .

434 • Let  $k$  be the index of the “most negatively classified” support sample, i.e.,

$$k := \arg \min_{i \in \mathcal{S}} \{\langle \bar{\mathbf{w}}_t, \bar{\mathbf{x}}_i \rangle\},$$

435 then by Definition 2 it holds that

$$\langle \bar{\mathbf{w}}_t, \bar{\mathbf{x}}_k \rangle \leq -b \cdot \|\bar{\mathbf{w}}_t\|_2. \quad (9)$$

436 • Let  $j$  be the index of the “most negatively classified” sample, i.e.,

$$j := \arg \min_{1 \leq i \leq n} \{w_t x_i + \langle \bar{\mathbf{w}}_t, \bar{\mathbf{x}}_i \rangle\}.$$

437 Then

$$w_t x_j + \langle \bar{\mathbf{w}}_t, \bar{\mathbf{x}}_j \rangle \leq w_t x_i + \langle \bar{\mathbf{w}}_t, \bar{\mathbf{x}}_i \rangle \text{ for every } i \in [n]. \quad (10)$$

438 In particular, we must have

$$\langle \bar{\mathbf{w}}_t, \bar{\mathbf{x}}_j \rangle \leq -b \|\bar{\mathbf{w}}_t\|_2, \quad (11)$$

439 since

$$\begin{aligned} w_t \gamma + \langle \bar{\mathbf{w}}_t, \bar{\mathbf{x}}_j \rangle &\leq w_t x_j + \langle \bar{\mathbf{w}}_t, \bar{\mathbf{x}}_j \rangle && \text{by Definition 1} \\ &\leq \min_{i \in \mathcal{S}} \{w_t x_i + \langle \bar{\mathbf{w}}_t, \bar{\mathbf{x}}_i \rangle\} && \text{by (10)} \\ &= w_t \gamma + \min_{i \in \mathcal{S}} \{\langle \bar{\mathbf{w}}_t, \bar{\mathbf{x}}_i \rangle\} && \text{by Definition 1} \\ &\leq w_t \gamma - b \|\bar{\mathbf{w}}_t\|_2. && \text{by Definition 2} \end{aligned}$$

440 We remark that it is possible that  $k = j$ .

441 **Step 0: an iterate norm recursion.** Recall that

$$\bar{\mathbf{w}}_{t+1} = \bar{\mathbf{w}}_t - \eta \nabla_{\bar{\mathbf{w}}} L(w_t, \bar{\mathbf{w}}_t), \quad \nabla_{\bar{\mathbf{w}}} L(w_t, \bar{\mathbf{w}}_t) = - \sum_{i=1}^n \frac{1}{1 + e^{w_t x_i + \bar{\mathbf{w}}_t^\top \bar{\mathbf{x}}_i}} \cdot \bar{\mathbf{x}}_i.$$

442 Then

$$\|\bar{\mathbf{w}}_{t+1}\|_2^2 = \|\bar{\mathbf{w}}_t\|_2^2 - 2\eta \cdot \langle \bar{\mathbf{w}}_t, \nabla_{\bar{\mathbf{w}}} L(w_t, \bar{\mathbf{w}}_t) \rangle + \eta^2 \cdot \|\nabla_{\bar{\mathbf{w}}} L(w_t, \bar{\mathbf{w}}_t)\|_2^2.$$

443 **Step 1: gradient norm bounds.** By definition, we have

$$\begin{aligned} \|\nabla_{\bar{\mathbf{w}}} L(w_t, \bar{\mathbf{w}}_t)\|_2 &= \left\| \sum_{i=1}^n \frac{1}{1 + e^{w_t x_i + \bar{\mathbf{w}}_t^\top \bar{\mathbf{x}}_i}} \cdot \bar{\mathbf{x}}_i \right\|_2 \\ &\leq \sum_{i=1}^n \frac{1}{1 + e^{w_t x_i + \bar{\mathbf{w}}_t^\top \bar{\mathbf{x}}_i}} \cdot \|\bar{\mathbf{x}}_i\|_2 \\ &\leq \sum_{i=1}^n \frac{1}{1 + e^{w_t x_i + \bar{\mathbf{w}}_t^\top \bar{\mathbf{x}}_i}} && \text{by Assumption 2} \\ &\leq \frac{n}{1 + e^{w_t x_j + \bar{\mathbf{w}}_t^\top \bar{\mathbf{x}}_j}} && \text{by (10)} \\ &\leq n. && (12) \end{aligned}$$

444 Therefore, we have

$$\begin{aligned} \|\nabla_{\bar{\mathbf{w}}} L(w_t, \bar{\mathbf{w}}_t)\|_2^2 &\leq \left( \frac{n}{1 + e^{w_t x_j + \bar{\mathbf{w}}_t^\top \bar{\mathbf{x}}_j}} \right) \cdot \|\nabla_{\bar{\mathbf{w}}} L(w_t, \bar{\mathbf{w}}_t)\|_2 && \text{by (12)} \\ &\leq \frac{n^2}{1 + e^{w_t x_j + \bar{\mathbf{w}}_t^\top \bar{\mathbf{x}}_j}}. && \text{by (13)} \end{aligned} \quad (14)$$

445 **Step 2: cross-term bounds.** We aim to show that the negative parts in the cross-term can cancel  
446 both the positive parts in the cross-term and the squared gradient norm term.

447 Note that the following holds for either  $j = k$  or  $j \neq k$ :

$$\begin{aligned} & - \langle \bar{\mathbf{w}}_t, \nabla_{\bar{\mathbf{w}}} L(w_t, \bar{\mathbf{w}}_t) \rangle \\ &= \sum_{i=1}^n \frac{1}{1 + e^{w_t x_i + \bar{\mathbf{w}}_t^\top \bar{\mathbf{x}}_i}} \cdot \bar{\mathbf{w}}_t^\top \bar{\mathbf{x}}_i \\ &\leq \sum_{\bar{\mathbf{w}}_t^\top \bar{\mathbf{x}}_i > 0} \frac{1}{1 + e^{w_t x_i + \bar{\mathbf{w}}_t^\top \bar{\mathbf{x}}_i}} \cdot \bar{\mathbf{w}}_t^\top \bar{\mathbf{x}}_i \\ &\quad + \frac{1}{2} \cdot \frac{1}{1 + e^{w_t x_j + \bar{\mathbf{w}}_t^\top \bar{\mathbf{x}}_j}} \cdot \bar{\mathbf{w}}_t^\top \bar{\mathbf{x}}_j + \frac{1}{2} \cdot \frac{1}{1 + e^{w_t x_k + \bar{\mathbf{w}}_t^\top \bar{\mathbf{x}}_k}} \cdot \bar{\mathbf{w}}_t^\top \bar{\mathbf{x}}_k. \end{aligned} \quad (15)$$

448 The first term in (15) can be bounded by

$$\begin{aligned} & \sum_{\bar{\mathbf{w}}_t^\top \bar{\mathbf{x}}_i > 0} \frac{1}{1 + e^{w_t x_i + \bar{\mathbf{w}}_t^\top \bar{\mathbf{x}}_i}} \cdot \bar{\mathbf{w}}_t^\top \bar{\mathbf{x}}_i \\ &= \sum_{\bar{\mathbf{w}}_t^\top \bar{\mathbf{x}}_i > 0} \frac{e^{-w_t x_i}}{1 + e^{-w_t x_i - \bar{\mathbf{w}}_t^\top \bar{\mathbf{x}}_i}} \cdot e^{-\bar{\mathbf{w}}_t^\top \bar{\mathbf{x}}_i} \cdot \bar{\mathbf{w}}_t^\top \bar{\mathbf{x}}_i \\ &\leq \sum_{\bar{\mathbf{w}}_t^\top \bar{\mathbf{x}}_i > 0} \frac{e^{-w_t x_i}}{1 + e^{-w_t x_i - \bar{\mathbf{w}}_t^\top \bar{\mathbf{x}}_i}} && \text{since } e^{-t} \cdot t \leq 1 \\ &\leq \sum_{\bar{\mathbf{w}}_t^\top \bar{\mathbf{x}}_i > 0} e^{-w_t x_i} \\ &\leq n e^{-\gamma w_t}. && \text{since } x_i \geq \gamma \text{ for } i \in [n] \end{aligned} \quad (16)$$

449 The second term in (15) can be bounded by

$$\frac{1}{2} \cdot \frac{1}{1 + e^{w_t x_j + \bar{\mathbf{w}}_t^\top \bar{\mathbf{x}}_j}} \cdot \bar{\mathbf{w}}_t^\top \bar{\mathbf{x}}_j \leq \frac{1}{2} \cdot \frac{-b \cdot \|\bar{\mathbf{w}}_t\|_2}{1 + e^{w_t x_j + \bar{\mathbf{w}}_t^\top \bar{\mathbf{x}}_j}}. \quad \text{by (11)} \quad (17)$$

450 The third term in (15) can be bounded by

$$\begin{aligned} \frac{1}{2} \cdot \frac{1}{1 + e^{w_t x_k + \bar{\mathbf{w}}_t^\top \bar{\mathbf{x}}_k}} \cdot \bar{\mathbf{w}}_t^\top \bar{\mathbf{x}}_k &\leq \frac{1}{2} \cdot \frac{-b \cdot \|\bar{\mathbf{w}}_t\|_2}{1 + e^{w_t \gamma + \bar{\mathbf{w}}_t^\top \bar{\mathbf{x}}_k}} && \text{by (9) and the choice of } k \\ &= \frac{-b \cdot \|\bar{\mathbf{w}}_t\|_2}{2} \cdot \frac{e^{-w_t \gamma}}{e^{-w_t \gamma} + e^{\bar{\mathbf{w}}_t^\top \bar{\mathbf{x}}_k}} \\ &\leq \frac{-b \cdot \|\bar{\mathbf{w}}_t\|_2}{2} \cdot \frac{e^{-w_t \gamma}}{2}, && \text{since } e^{-w_t \gamma}, e^{\bar{\mathbf{w}}_t^\top \bar{\mathbf{x}}_k} \leq 1 \end{aligned} \quad (18)$$

451 since

$$\begin{aligned} w_t \gamma &\geq 0, && \text{by Lemma B.1} \\ \bar{\mathbf{w}}_t^\top \bar{\mathbf{x}}_k &\leq 0. && \text{by the choice of } k \end{aligned}$$

452 Now, bringing (16), (17), and (18) into (15), we obtain

$$-\langle \bar{\mathbf{w}}_t, \nabla_{\bar{\mathbf{w}}_t} L(w_t, \bar{\mathbf{w}}_t) \rangle \leq e^{-w_t \gamma} \cdot \left( n - \frac{b \cdot \|\bar{\mathbf{w}}_t\|_2}{4} \right) - \frac{b \cdot \|\bar{\mathbf{w}}_t\|_2}{2} \cdot \frac{1}{1 + e^{w_t x_j + \bar{\mathbf{w}}_t^\top \bar{\mathbf{x}}_j}}. \quad (19)$$

453 **Step 3: iterate norm recursion bounds.** Using (14) and (19), we can obtain

$$\begin{aligned} \|\bar{\mathbf{w}}_{t+1}\|_2^2 &= \|\bar{\mathbf{w}}_t\|_2^2 - 2\eta \cdot \langle \bar{\mathbf{w}}_t, \nabla_{\bar{\mathbf{w}}_t} L(w_t, \bar{\mathbf{w}}_t) \rangle + \eta^2 \cdot \|\nabla_{\bar{\mathbf{w}}_t} L(w_t, \bar{\mathbf{w}}_t)\|_2^2 \\ &\leq \|\bar{\mathbf{w}}_t\|_2^2 + 2\eta e^{-w_t \gamma} \cdot \left( n - \frac{b \cdot \|\bar{\mathbf{w}}_t\|_2}{4} \right) - \eta b \cdot \|\bar{\mathbf{w}}_t\|_2 \cdot \frac{1}{1 + e^{w_t x_j + \bar{\mathbf{w}}_t^\top \bar{\mathbf{x}}_j}} \\ &\quad + \eta^2 \cdot \frac{n^2}{1 + e^{w_t x_j + \bar{\mathbf{w}}_t^\top \bar{\mathbf{x}}_j}} \\ &= \|\bar{\mathbf{w}}_t\|_2^2 + 2\eta e^{-w_t \gamma} \cdot \left( n - \frac{b \cdot \|\bar{\mathbf{w}}_t\|_2}{4} \right) + \frac{\eta}{1 + e^{w_t x_j + \bar{\mathbf{w}}_t^\top \bar{\mathbf{x}}_j}} \cdot (\eta n^2 - b \cdot \|\bar{\mathbf{w}}_t\|_2). \end{aligned}$$

454 We have completed the proof.  $\square$

455 **Lemma B.3** (Boundedness of  $\bar{\mathbf{w}}$ ). *Suppose that Assumptions 1, 2, and 3 hold. Consider  $(\bar{\mathbf{w}}_t)_{t \geq 0}$*   
 456 *defined by (8) with constant stepsize  $\eta > 0$ . Then for every  $t \geq 0$ , it holds that*

$$\|\bar{\mathbf{w}}_t\|_2 \leq W_{\max} := \max\{4n/b, \eta n^2/b\} + \eta n.$$

457 *Proof.* We prove the claim by induction. Clearly,  $\|\bar{\mathbf{w}}_0\|_2 = 0 \leq \max\{4n/b, \eta n^2/b\} + \eta n$ . Now  
 458 suppose that

$$\|\bar{\mathbf{w}}_t\|_2 \leq \max\{4n/b, \eta n^2/b\} + \eta n,$$

459 and discuss the following two cases:

460 1. If  $\|\bar{\mathbf{w}}_t\|_2 \leq \max\{4n/b, \eta n^2/b\}$ , then

$$\begin{aligned} \|\bar{\mathbf{w}}_{t+1}\|_2 &\leq \|\bar{\mathbf{w}}_t\|_2 + \|\eta \cdot \nabla_{\bar{\mathbf{w}}_t} L(w_t, \bar{\mathbf{w}}_t)\|_2 && \text{by triangle inequality} \\ &\leq \|\bar{\mathbf{w}}_t\|_2 + \eta n && \text{by (13)} \\ &\leq \max\{4n/b, \eta n^2/b\} + \eta n. \end{aligned}$$

461 2. Else, we have

$$\max\{4n/b, \eta n^2/b\} \leq \|\bar{\mathbf{w}}_t\|_2 \leq \max\{4n/b, \eta n^2/b\} + \eta n,$$

462 which implies

$$\begin{aligned} \|\bar{\mathbf{w}}_{t+1}\|_2 &\leq \|\bar{\mathbf{w}}_t\|_2 && \text{by Lemma B.2} \\ &\leq \max\{4n/b, \eta n^2/b\} + \eta n. \end{aligned}$$

463 This completes the induction.  $\square$



### 464 B.3 Divergence of GD in the Max-Margin Subspace

465 **Definition 3** (Some loss measurements in the non-separable subspace). Under Assumptions 1, 2, and  
 466 3, we define the following notations:

467 (A) Define two loss functions

$$G(\bar{\mathbf{w}}) := \sum_{i \in \mathcal{S}} e^{-\bar{\mathbf{w}}^\top \bar{\mathbf{x}}_i}, \quad H(\bar{\mathbf{w}}) := \sum_{i \notin \mathcal{S}} e^{-\bar{\mathbf{w}}^\top \bar{\mathbf{x}}_i}.$$

468 In the case where  $\mathcal{S} = [n]$ , we define  $H(\bar{\mathbf{w}}) = 0$ .

469 (B) Define

$$G_{\min} := \min_{\bar{\mathbf{w}} \in \mathbb{R}^{d-1}} G(\bar{\mathbf{w}}),$$

470 It is clear that  $G_{\min} \geq 1$  since  $(\bar{\mathbf{x}}_i)_{i \in \mathcal{S}}$  are non-separable by Definition 2.

471 (C) Define

$$\bar{\mathbf{w}}_* := \arg \min_{\bar{\mathbf{w}} \in \mathbb{R}^{d-1}} G(\bar{\mathbf{w}}).$$

472 It is clear that  $G(\bar{\mathbf{w}}_*) = G_{\min}$ . Moreover, it holds that  $\|\bar{\mathbf{w}}_*\|_2 \leq W_{\max}$  by Lemma B.4.

473 (D) Recall that  $\|\bar{\mathbf{w}}_t\|_2 \leq W_{\max}$  according to Lemma B.3. We then define

$$G_{\max} := \sup_{\|\bar{\mathbf{w}}\|_2 \leq W_{\max}} G(\bar{\mathbf{w}}), \quad H_{\max} := \sup_{\|\bar{\mathbf{w}}\|_2 \leq W_{\max}} H(\bar{\mathbf{w}}).$$

474 It is clear that

$$G(\bar{\mathbf{w}}_t) \leq G_{\max}, \quad H(\bar{\mathbf{w}}_t) \leq H_{\max},$$

475 and that  $G_{\max}$ ,  $H_{\max}$  are polynomials on  $e^\eta$ ,  $e^n$ , and  $e^{1/b}$ , and are independent of  $t$ .

476 **Lemma B.4.** For the  $\bar{\mathbf{w}}_*$  in Definition 3, it holds that

$$\|\bar{\mathbf{w}}_*\|_2 \leq \frac{\log(n)}{b} \leq W_{\max}.$$

477 *Proof.* By Definition 2, there exists  $j \in \mathcal{S}$  such that

$$\bar{\mathbf{w}}_*^\top \bar{\mathbf{x}}_j \leq -b \cdot \|\bar{\mathbf{w}}_*\|_2,$$

478 which implies that

$$G(\bar{\mathbf{w}}_*) = \sum_{i \in \mathcal{S}} e^{-\bar{\mathbf{w}}_*^\top \bar{\mathbf{x}}_i} \geq e^{-\bar{\mathbf{w}}_*^\top \bar{\mathbf{x}}_j} \geq e^{b \cdot \|\bar{\mathbf{w}}_*\|_2}.$$

479 On the other hand, by the definition of  $\bar{\mathbf{w}}_*$ , we have

$$G(\bar{\mathbf{w}}_*) \leq G(0) = n.$$

480 Therefore, we have  $e^{b \cdot \|\bar{\mathbf{w}}_*\|_2} \leq n$ , that is,  $\|\bar{\mathbf{w}}_*\|_2 \leq \log(n)/b \leq W_{\max}$ .

481 □

482 We now consider  $(w_t)_{t \geq 0}$ .

483 **Lemma B.5.** Suppose Assumptions 1, 2, and 3 hold. Then for every  $t \geq 0$ , it holds that

$$\begin{aligned} w_{t+1} &\geq w_t + \frac{\eta\gamma}{2} \cdot \min \left\{ 1, e^{-\gamma w_t} \cdot G(\bar{\mathbf{w}}_t) \right\}, \\ w_{t+1} &\leq w_t + \eta \cdot \min \left\{ \gamma n, \gamma \cdot e^{-\gamma w_t} \cdot G(\bar{\mathbf{w}}_t) + \eta \cdot e^{-\theta w_t} \cdot H(\bar{\mathbf{w}}_t) \right\}. \end{aligned}$$

484 *Proof.* Recall that

$$w_{t+1} = w_t - \eta \cdot \nabla_w L(w_t, \bar{\mathbf{w}}_t), \quad \nabla_w L(w_t, \bar{\mathbf{w}}_t) = - \sum_{i=1}^n \frac{e^{-x_i w_t - \bar{\mathbf{x}}_i^\top \bar{\mathbf{w}}_t}}{1 + e^{-x_i w_t - \bar{\mathbf{x}}_i^\top \bar{\mathbf{w}}_t}} \cdot x_i.$$

485 We only need to provide upper and lower bounds on  $-\nabla_w L(w_t, \bar{\mathbf{w}}_t)$ . The lower bound is because:

$$\begin{aligned}
-\nabla_w L(w_t, \bar{\mathbf{w}}_t) &= \sum_{i=1}^n \frac{e^{-x_i w_t - \bar{\mathbf{x}}_i^\top \bar{\mathbf{w}}_t}}{1 + e^{-x_i w_t - \bar{\mathbf{x}}_i^\top \bar{\mathbf{w}}_t}} \cdot x_i \\
&\geq \sum_{i \in \mathcal{S}} \frac{e^{-x_i w_t - \bar{\mathbf{x}}_i^\top \bar{\mathbf{w}}_t}}{1 + e^{-x_i w_t - \bar{\mathbf{x}}_i^\top \bar{\mathbf{w}}_t}} \cdot x_i && \text{since } x_i \geq \gamma > 0 \text{ by Definition 1} \\
&= \sum_{i \in \mathcal{S}} \frac{e^{-\gamma w_t - \bar{\mathbf{x}}_i^\top \bar{\mathbf{w}}_t}}{1 + e^{-\gamma w_t - \bar{\mathbf{x}}_i^\top \bar{\mathbf{w}}_t}} \cdot \gamma && \text{since } x_i = \gamma \text{ for } i \in \mathcal{S} \\
&\geq \frac{\gamma}{2} \cdot \sum_{i \in \mathcal{S}} \min\{1, e^{-\gamma w_t - \bar{\mathbf{x}}_i^\top \bar{\mathbf{w}}_t}\} && \text{since } e^t / (1 + e^t) \geq 0.5 \min\{1, e^t\} \\
&\geq \frac{\gamma}{2} \cdot \min\left\{1, e^{-\gamma w_t} \cdot \sum_{i \in \mathcal{S}} e^{-\bar{\mathbf{x}}_i^\top \bar{\mathbf{w}}_t}\right\} \\
&= \frac{\gamma}{2} \cdot \min\{1, e^{-\gamma w_t} \cdot G(\bar{\mathbf{w}}_t)\}.
\end{aligned}$$

486 The upper bound is because:

$$\begin{aligned}
-\nabla_w L(w_t, \bar{\mathbf{w}}_t) &= \sum_{i=1}^n \frac{e^{-x_i w_t - \bar{\mathbf{x}}_i^\top \bar{\mathbf{w}}_t}}{1 + e^{-x_i w_t - \bar{\mathbf{x}}_i^\top \bar{\mathbf{w}}_t}} \cdot x_i \\
&= \sum_{i \in \mathcal{S}} \frac{e^{-x_i w_t - \bar{\mathbf{x}}_i^\top \bar{\mathbf{w}}_t}}{1 + e^{-x_i w_t - \bar{\mathbf{x}}_i^\top \bar{\mathbf{w}}_t}} \cdot x_i + \sum_{i \notin \mathcal{S}} \frac{e^{-x_i w_t - \bar{\mathbf{x}}_i^\top \bar{\mathbf{w}}_t}}{1 + e^{-x_i w_t - \bar{\mathbf{x}}_i^\top \bar{\mathbf{w}}_t}} \cdot x_i \\
&\leq \sum_{i \in \mathcal{S}} \frac{e^{-\gamma w_t - \bar{\mathbf{x}}_i^\top \bar{\mathbf{w}}_t}}{1 + e^{-\gamma w_t - \bar{\mathbf{x}}_i^\top \bar{\mathbf{w}}_t}} \cdot \gamma + \sum_{i \notin \mathcal{S}} \frac{e^{-x_i w_t - \bar{\mathbf{x}}_i^\top \bar{\mathbf{w}}_t}}{1 + e^{-x_i w_t - \bar{\mathbf{x}}_i^\top \bar{\mathbf{w}}_t}} \\
&\quad \text{since } x_i = \gamma \text{ for } i \in \mathcal{S}, \text{ and } x_i \leq 1 \text{ for } i \in [n] \\
&\leq \gamma \cdot \sum_{i \in \mathcal{S}} \min\{1, e^{-\gamma w_t - \bar{\mathbf{x}}_i^\top \bar{\mathbf{w}}_t}\} + \sum_{i \notin \mathcal{S}} \min\{1, e^{-w_t x_i - \bar{\mathbf{x}}_i^\top \bar{\mathbf{w}}_t}\} \\
&\quad \text{since } e^t / (1 + e^t) \leq \min\{1, e^t\} \\
&\leq \gamma \cdot \sum_{i \in \mathcal{S}} \min\{1, e^{-\gamma w_t - \bar{\mathbf{x}}_i^\top \bar{\mathbf{w}}_t}\} + \sum_{i \notin \mathcal{S}} \min\{1, e^{-\theta w_t - \bar{\mathbf{x}}_i^\top \bar{\mathbf{w}}_t}\} \\
&\quad \text{since } x_t \geq \theta > \gamma \text{ for } i \notin \mathcal{S} \\
&\leq \gamma \cdot \sum_{i \in \mathcal{S}} e^{-\gamma w_t - \bar{\mathbf{x}}_i^\top \bar{\mathbf{w}}_t} + \sum_{i \notin \mathcal{S}} e^{-\theta w_t - \bar{\mathbf{x}}_i^\top \bar{\mathbf{w}}_t} \\
&= \gamma e^{-\gamma w_t} \cdot G(\bar{\mathbf{w}}_t) + e^{-\theta w_t} \cdot H(\bar{\mathbf{w}}_t).
\end{aligned}$$

487 We have completed the proof. □

488 **Lemma B.6** (A lower bound on  $w_t$ ). *Suppose Assumptions 2, 1, and 3 hold. Then it holds that*

$$w_t \geq \frac{1}{\gamma} \cdot \log\left(1 + \frac{\eta\gamma^2}{2} \cdot t\right), \quad t \geq 0.$$

489 As a direct consequence, it holds that

$$e^{-\gamma w_t} \leq \frac{2}{2 + \eta\gamma^2 \cdot t}, \quad t \geq 0.$$

490 *Proof.* Observe that

$$\begin{aligned}
w_{t+1} &\geq w_t + \frac{\eta\gamma}{2} \cdot \min\{1, e^{-\gamma w_t} \cdot G(\bar{\mathbf{w}}_t)\} && \text{by Lemma B.5} \\
&\geq w_t + \frac{\eta\gamma}{2} \cdot \min\{1, e^{-\gamma w_t} \cdot 1\} && \text{by Definition 3}
\end{aligned}$$

$$\geq w_t + \frac{\eta\gamma}{2} \cdot e^{-\gamma w_t}, \quad \text{since } w_t \geq 0 \text{ by Lemma B.1} \quad (20)$$

491 which implies that  $w_t$  is increasing. Furthermore, we have

$$\begin{aligned} e^{\gamma w_{t+1}} - e^{\gamma w_t} &= e^{\gamma w_t} \cdot (e^{\gamma(w_{t+1}-w_t)} - 1) \\ &\geq e^{\gamma w_t} \cdot \gamma(w_{t+1} - w_t) \quad \text{since } e^t - 1 \geq t \text{ for } t \geq 0, \text{ and } w_{t+1} \geq w_t \\ &\geq \frac{\eta\gamma^2}{2}, \quad \text{by (20)} \end{aligned}$$

492 which implies that

$$\begin{aligned} e^{\gamma w_t} &\geq e^{\gamma w_0} + \frac{\eta\gamma^2}{2} \cdot t \\ &= 1 + \frac{\eta\gamma^2}{2} \cdot t. \quad \text{since } w_0 = 0 \end{aligned}$$

493 We then get

$$w_t \geq \frac{1}{\gamma} \cdot \log \left( 1 + \frac{\eta\gamma^2}{2} \cdot t \right), \quad t \geq 0.$$

494

□

495 **Lemma B.7** (An upper bound on  $w_t$ ). *Suppose Assumptions 1, 2, and 3 hold. Then it holds that*

$$w_t \leq \frac{1}{\gamma} \cdot \log \left( (e\eta\gamma^2 G_{\max} + e\eta\gamma H_{\max}) \cdot (t+1) \right), \quad t \geq 0.$$

496 As a direct consequence, it holds that

$$e^{-\gamma w_t} \geq \frac{1}{(e\eta\gamma^2 G_{\max} + e\eta\gamma H_{\max}) \cdot (t+1)}, \quad t \geq 0.$$

497 *Proof.* Observe that

$$\begin{aligned} w_{t+1} - w_t &\leq \eta\gamma \cdot e^{-\gamma w_t} \cdot G(\bar{\mathbf{w}}_t) + \eta \cdot e^{-\theta w_t} \cdot H(\bar{\mathbf{w}}_t) \quad \text{by Lemma B.5} \\ &\leq \eta\gamma \cdot e^{-\gamma w_t} \cdot G(\bar{\mathbf{w}}_t) + \eta \cdot e^{-\gamma w_t} \cdot H(\bar{\mathbf{w}}_t) \quad \text{since } \theta > \gamma \text{ by Definition 1} \\ &\leq \eta \cdot (\gamma G_{\max} + H_{\max}) \cdot e^{-\gamma w_t} \quad \text{by Definition 3} \end{aligned} \quad (21)$$

498 Let

$$t_0 := \min \{ t : \eta\gamma \cdot (\gamma G_{\max} + H_{\max}) \cdot e^{-\gamma w_t} \leq 1 \}.$$

499 Recall that  $w_t$  is increasing according to (20). So we have

$$\text{for } t \leq t_0, \quad w_t \leq \frac{1}{\gamma} \cdot \log (\eta\gamma^2 G_{\max} + \eta\gamma H_{\max}); \quad (22)$$

$$\text{for } t \geq t_0, \quad \eta\gamma \cdot (\gamma G_{\max} + H_{\max}) \cdot e^{-\gamma w_t} \leq 1. \quad (23)$$

500 (21) and (23) together imply that

$$\text{for } t \geq t_0, \quad 0 \leq \gamma \cdot (w_{t+1} - w_t) \leq 1. \quad (24)$$

501 Then for  $t \geq t_0$ , we have

$$\begin{aligned} e^{\gamma w_{t+1}} - e^{\gamma w_t} &= e^{\gamma w_t} (e^{\gamma(w_{t+1}-w_t)} - 1) \\ &\leq e^{\gamma w_t} \cdot e \cdot \gamma(w_{t+1} - w_t) \quad \text{by (24) and that } e^t - 1 \leq e \cdot t \text{ for } 0 \leq t \leq 1 \\ &\leq e\eta\gamma^2 G_{\max} + e\eta\gamma H_{\max}, \quad \text{by (21)}. \end{aligned}$$

502 which implies

$$\begin{aligned} e^{\gamma w_t} &\leq e^{\gamma w_{t_0}} + (e\eta\gamma^2 G_{\max} + e\eta\gamma H_{\max}) \cdot (t - t_0) \\ &\leq \eta\gamma^2 G_{\max} + \eta\gamma H_{\max} + (e\eta\gamma^2 G_{\max} + e\eta\gamma H_{\max}) \cdot (t - t_0) \quad \text{by (22)} \\ &\leq (e\eta\gamma^2 G_{\max} + e\eta\gamma H_{\max}) \cdot (t + 1). \end{aligned}$$

503 Therefore, for  $t \geq t_0$ , we have

$$w_t \leq \frac{1}{\gamma} \cdot \log \left( (e\eta\gamma^2 G_{\max} + e\eta\gamma H_{\max}) \cdot (t + 1) \right).$$

504 Note that the above also holds for  $0 \leq t \leq t_0$  according to (22). We have completed the proof. □

#### 505 B.4 Convergence of GD in the Non-Separable Subspace

506 We show that the vanilla gradient on the non-separable subspace,  $\nabla_{\bar{\mathbf{w}}} L(w_t, \bar{\mathbf{w}}_t)$ , can be understood as  
 507 the gradient on a modified loss with a rescaling factor,  $e^{-\gamma w_t} \nabla G(\bar{\mathbf{w}}_t)$ , ignoring higher order errors.

508 **Lemma B.8** (Gradients comparison lemma). *Suppose Assumptions 1, 2, and 3 hold. Then it holds*  
 509 *that*

$$\|\nabla_{\bar{\mathbf{w}}} L(w_t, \bar{\mathbf{w}}_t) - e^{-\gamma w_t} \cdot \nabla G(\bar{\mathbf{w}}_t)\|_2 \leq e^{-2\gamma w_t} \cdot G_{\max}^2 + e^{-\theta w_t} \cdot H_{\max}, \quad t \geq 0.$$

510 As a direct consequence, for every vector  $\bar{\mathbf{v}} \in \mathbb{R}^{d-1}$ , it holds that

$$\langle \bar{\mathbf{v}}, \nabla_{\bar{\mathbf{w}}} L(w_t, \bar{\mathbf{w}}_t) \rangle \leq e^{-\gamma w_t} \cdot \langle \bar{\mathbf{v}}, \nabla G(\bar{\mathbf{w}}_t) \rangle + \|\bar{\mathbf{v}}\|_2 \cdot (e^{-2\gamma w_t} \cdot G_{\max}^2 + e^{-\theta w_t} \cdot H_{\max}).$$

511 *Proof.* Recall that

$$\nabla_{\bar{\mathbf{w}}} L(w_t, \bar{\mathbf{w}}_t) = - \sum_{i=1}^n \frac{e^{-w_t x_i - \bar{\mathbf{w}}_t^\top \bar{\mathbf{x}}_i}}{1 + e^{-w_t x_i - \bar{\mathbf{w}}_t^\top \bar{\mathbf{x}}_i}} \cdot \bar{\mathbf{x}}_i \quad \nabla G(\bar{\mathbf{w}}_t) = - \sum_{i \in \mathcal{S}} e^{-\bar{\mathbf{w}}_t^\top \bar{\mathbf{x}}_i} \cdot \bar{\mathbf{x}}_i.$$

512 By the triangle inequality, we have

$$\begin{aligned} & \|\nabla_{\bar{\mathbf{w}}} L(w_t, \bar{\mathbf{w}}_t) - e^{-\gamma w_t} \nabla G(\bar{\mathbf{w}}_t)\|_2 \\ &= \left\| \sum_{i \in \mathcal{S}} \left( e^{-\gamma w_t - \bar{\mathbf{w}}_t^\top \bar{\mathbf{x}}_i} - \frac{e^{-w_t x_i - \bar{\mathbf{w}}_t^\top \bar{\mathbf{x}}_i}}{1 + e^{-w_t x_i - \bar{\mathbf{w}}_t^\top \bar{\mathbf{x}}_i}} \right) \cdot \bar{\mathbf{x}}_i - \sum_{i \notin \mathcal{S}} \frac{e^{-w_t x_i - \bar{\mathbf{w}}_t^\top \bar{\mathbf{x}}_i}}{1 + e^{-w_t x_i - \bar{\mathbf{w}}_t^\top \bar{\mathbf{x}}_i}} \cdot \bar{\mathbf{x}}_i \right\|_2 \\ &\leq \underbrace{\left\| \sum_{i \in \mathcal{S}} \left( e^{-\gamma w_t - \bar{\mathbf{w}}_t^\top \bar{\mathbf{x}}_i} - \frac{e^{-w_t x_i - \bar{\mathbf{w}}_t^\top \bar{\mathbf{x}}_i}}{1 + e^{-w_t x_i - \bar{\mathbf{w}}_t^\top \bar{\mathbf{x}}_i}} \right) \cdot \bar{\mathbf{x}}_i \right\|_2}_{(\clubsuit)} + \underbrace{\left\| \sum_{i \notin \mathcal{S}} \frac{e^{-w_t x_i - \bar{\mathbf{w}}_t^\top \bar{\mathbf{x}}_i}}{1 + e^{-w_t x_i - \bar{\mathbf{w}}_t^\top \bar{\mathbf{x}}_i}} \cdot \bar{\mathbf{x}}_i \right\|_2}_{(\heartsuit)}. \end{aligned} \quad (25)$$

513 The  $(\clubsuit)$  term can be bounded by

$$\begin{aligned} (\clubsuit) &= \left\| \sum_{i \in \mathcal{S}} \left( e^{-\gamma w_t - \bar{\mathbf{w}}_t^\top \bar{\mathbf{x}}_i} - \frac{e^{-\gamma w_t - \bar{\mathbf{w}}_t^\top \bar{\mathbf{x}}_i}}{1 + e^{-\gamma w_t - \bar{\mathbf{w}}_t^\top \bar{\mathbf{x}}_i}} \right) \cdot \bar{\mathbf{x}}_i \right\|_2 \quad \text{since } x_i = \gamma \text{ for } i \in \mathcal{S} \\ &= \left\| \sum_{i \in \mathcal{S}} \frac{e^{-\gamma w_t - \bar{\mathbf{w}}_t^\top \bar{\mathbf{x}}_i}}{1 + e^{-\gamma w_t - \bar{\mathbf{w}}_t^\top \bar{\mathbf{x}}_i}} \cdot e^{-\gamma w_t - \bar{\mathbf{w}}_t^\top \bar{\mathbf{x}}_i} \cdot \bar{\mathbf{x}}_i \right\|_2 \\ &= e^{-2\gamma w_t} \cdot \left\| \sum_{i \in \mathcal{S}} \frac{1}{1 + e^{-\gamma w_t - \bar{\mathbf{w}}_t^\top \bar{\mathbf{x}}_i}} \cdot e^{-2\bar{\mathbf{w}}_t^\top \bar{\mathbf{x}}_i} \cdot \bar{\mathbf{x}}_i \right\|_2 \\ &\leq e^{-2\gamma w_t} \cdot \sum_{i \in \mathcal{S}} \frac{1}{1 + e^{-\gamma w_t - \bar{\mathbf{w}}_t^\top \bar{\mathbf{x}}_i}} \cdot e^{-2\bar{\mathbf{w}}_t^\top \bar{\mathbf{x}}_i} \cdot \|\bar{\mathbf{x}}_i\|_2 \quad \text{by triangle inequality} \\ &\leq e^{-2\gamma w_t} \cdot \sum_{i \in \mathcal{S}} \frac{1}{1 + e^{-\gamma w_t - \bar{\mathbf{w}}_t^\top \bar{\mathbf{x}}_i}} \cdot e^{-2\bar{\mathbf{w}}_t^\top \bar{\mathbf{x}}_i} \quad \text{since } \|\bar{\mathbf{x}}_i\|_2 \leq 1 \text{ by Assumption 2} \\ &\leq e^{-2\gamma w_t} \cdot \sum_{i \in \mathcal{S}} e^{-2\bar{\mathbf{w}}_t^\top \bar{\mathbf{x}}_i} \\ &\leq e^{-2\gamma w_t} \cdot \left( \sum_{i \in \mathcal{S}} e^{-\bar{\mathbf{w}}_t^\top \bar{\mathbf{x}}_i} \right)^2 \\ &= e^{-2\gamma w_t} \cdot G(\bar{\mathbf{w}}_t)^2 \\ &\leq e^{-2\gamma w_t} \cdot G_{\max}^2. \quad \text{by Definition 3} \end{aligned}$$

514 The  $(\heartsuit)$  term can be bounded by

$$(\heartsuit) = \left\| \sum_{i \notin \mathcal{S}} \frac{e^{-w_t x_i - \bar{\mathbf{w}}_t^\top \bar{\mathbf{x}}_i}}{1 + e^{-w_t x_i - \bar{\mathbf{w}}_t^\top \bar{\mathbf{x}}_i}} \cdot \bar{\mathbf{x}}_i \right\|_2$$

$$\begin{aligned}
&\leq \sum_{i \notin \mathcal{S}} \frac{e^{-w_t x_i - \bar{\mathbf{w}}_t^\top \bar{\mathbf{x}}_i}}{1 + e^{-w_t x_i - \bar{\mathbf{w}}_t^\top \bar{\mathbf{x}}_i}} \cdot \|\bar{\mathbf{x}}_i\|_2 && \text{by triangle inequality} \\
&\leq \sum_{i \notin \mathcal{S}} \frac{e^{-w_t x_i - \bar{\mathbf{w}}_t^\top \bar{\mathbf{x}}_i}}{1 + e^{-w_t x_i - \bar{\mathbf{w}}_t^\top \bar{\mathbf{x}}_i}} && \text{since } \|\bar{\mathbf{x}}_i\|_2 \leq 1 \text{ by Assumption 2} \\
&\leq \sum_{i \notin \mathcal{S}} e^{-w_t x_i - \bar{\mathbf{w}}_t^\top \bar{\mathbf{x}}_i} \\
&\leq e^{-\theta w_t} \cdot \sum_{i \notin \mathcal{S}} e^{-\bar{\mathbf{w}}_t^\top \bar{\mathbf{x}}_i} && x_i \geq \theta > \gamma \text{ for } i \notin \mathcal{S} \\
&= e^{-\theta w_t} \cdot H(\bar{\mathbf{w}}) \\
&\leq e^{-\theta w_t} \cdot H_{\max}. && \text{by Definition 3}
\end{aligned}$$

515 Bringing the bounds on the ( $\clubsuit$ ) and ( $\heartsuit$ ) into (25), we obtain

$$\|\nabla_{\bar{\mathbf{w}}} L(w_t, \bar{\mathbf{w}}_t) - e^{-\gamma w_t} \cdot \nabla G(\bar{\mathbf{w}}_t)\|_2 \leq e^{-2\gamma w_t} \cdot G_{\max}^2 + e^{-\theta w_t} \cdot H_{\max}, \quad t \geq 0.$$

516 We have shown the first conclusion. The second conclusion follows from the first conclusion: for  
517 every  $\mathbf{v} \in \mathbb{R}^{d-1}$ ,

$$\begin{aligned}
\langle \bar{\mathbf{v}}, \nabla_{\bar{\mathbf{w}}} L(w_t, \bar{\mathbf{w}}_t) \rangle &= e^{-\gamma w_t} \cdot \langle \bar{\mathbf{v}}, \nabla G(\bar{\mathbf{w}}_t) \rangle + \langle \bar{\mathbf{v}}, \nabla_{\bar{\mathbf{w}}} L(w_t, \bar{\mathbf{w}}_t) - e^{-\gamma w_t} \cdot \nabla G(\bar{\mathbf{w}}_t) \rangle \\
&\leq e^{-\gamma w_t} \cdot \langle \bar{\mathbf{v}}, \nabla G(\bar{\mathbf{w}}_t) \rangle + \|\bar{\mathbf{v}}\|_2 \cdot \|\nabla_{\bar{\mathbf{w}}} L(w_t, \bar{\mathbf{w}}_t) - e^{-\gamma w_t} \cdot \nabla G(\bar{\mathbf{w}}_t)\|_2 \\
&\leq e^{-\gamma w_t} \cdot \langle \bar{\mathbf{v}}, \nabla G(\bar{\mathbf{w}}_t) \rangle + \|\bar{\mathbf{v}}\|_2 \cdot (e^{-2\gamma w_t} \cdot G_{\max}^2 + e^{-\theta w_t} \cdot H_{\max}).
\end{aligned}$$

518 We have completed the proof.  $\square$

519 **Lemma B.9** (A gradient norm bound). *Suppose Assumptions 1, 2, and 3 hold. Then it holds that*

$$\|\nabla_{\bar{\mathbf{w}}} L(w_t, \bar{\mathbf{w}}_t)\|_2 \leq e^{-\gamma w_t} \cdot (G_{\max} + H_{\max}), \quad t \geq 0.$$

520 *Proof.* The inequality is because:

$$\begin{aligned}
\|\nabla_{\bar{\mathbf{w}}} L(w_t, \bar{\mathbf{w}}_t)\|_2 &= \left\| \sum_{i=1}^n \frac{e^{-w_t x_i - \bar{\mathbf{w}}_t^\top \bar{\mathbf{x}}_i}}{1 + e^{-w_t x_i - \bar{\mathbf{w}}_t^\top \bar{\mathbf{x}}_i}} \cdot \bar{\mathbf{x}}_i \right\|_2 \\
&\leq \sum_{i=1}^n \frac{e^{-w_t x_i - \bar{\mathbf{w}}_t^\top \bar{\mathbf{x}}_i}}{1 + e^{-w_t x_i - \bar{\mathbf{w}}_t^\top \bar{\mathbf{x}}_i}} \cdot \|\bar{\mathbf{x}}_i\|_2 && \text{by triangle inequality} \\
&\leq \sum_{i=1}^n \frac{e^{-w_t x_i - \bar{\mathbf{w}}_t^\top \bar{\mathbf{x}}_i}}{1 + e^{-w_t x_i - \bar{\mathbf{w}}_t^\top \bar{\mathbf{x}}_i}} && \text{since } \|\bar{\mathbf{x}}_i\|_2 \leq 1 \text{ by Assumption 2} \\
&\leq \sum_{i=1}^n e^{-w_t x_i - \bar{\mathbf{w}}_t^\top \bar{\mathbf{x}}_i} \\
&\leq e^{-\gamma w_t} \cdot \sum_{i=1}^n e^{-\bar{\mathbf{w}}_t^\top \bar{\mathbf{x}}_i} && \text{since } x_i \geq \gamma \text{ for } i \in [n] \\
&= e^{-\gamma w_t} \cdot (G(\bar{\mathbf{w}}_t) + H(\bar{\mathbf{w}}_t)) \\
&\leq e^{-\gamma w_t} \cdot (G_{\max} + H_{\max}).
\end{aligned}$$

521  $\square$

522 The next lemma shows that the function value is “non-increasing” ignoring higher order terms.

523 **Lemma B.10** (A modified descent lemma). *Suppose Assumptions 1, 2, and 3 hold. Then it holds that*

$$G(\bar{\mathbf{w}}_{t+1}) \leq G(\bar{\mathbf{w}}_t) + 2(\eta + \eta^2) \cdot G_{\max} \cdot (G_{\max}^2 + H_{\max}^2) \cdot (e^{-2\gamma w_t} + e^{-\theta w_t}), \quad t \geq 0.$$

524 *As a direct consequence of the above and Lemma B.6, it holds that*

$$G(\bar{\mathbf{w}}_{t+k}) \leq G(\bar{\mathbf{w}}_t) + c_0 \cdot 2(1 + \eta) G_{\max} \cdot \left( (t-1)^{-1} + (t-1)^{1-\frac{\theta}{\gamma}} \right), \quad k \geq 0, t \geq 1,$$

where  $\theta/\gamma > 1$  by Definition 1 and  $c_0$  is a polynomial on  $\{e^\eta, e^\eta, e^{1/b}, \frac{1}{\eta}, \frac{1}{\theta-\gamma}, \frac{1}{\gamma}, e^{\theta/\gamma}\}$  and is independent of  $t$ , given by

$$c_0 := \eta \cdot (G_{\max}^2 + H_{\max}^2) \cdot \frac{\theta}{\theta - \gamma} \cdot \max \left\{ \left( \frac{2}{\eta\gamma^2} \right)^2, \left( \frac{2}{\eta\gamma^2} \right)^{\theta/\gamma} \right\}.$$

*Proof.* Note that

$$\begin{aligned} \|\nabla^2 G(\bar{\mathbf{w}})\|_2 &= \left\| \sum_{i \in \mathcal{S}} e^{-\bar{\mathbf{w}}^\top \bar{\mathbf{x}}_i} \mathbf{x}_i \mathbf{x}_i^\top \right\|_2 \\ &\leq \sum_{i \in \mathcal{S}} e^{-\bar{\mathbf{w}}^\top \bar{\mathbf{x}}_i} \|\mathbf{x}_i\|_2^2 && \text{by triangle inequality} \\ &\leq \sum_{i \in \mathcal{S}} e^{-\bar{\mathbf{w}}^\top \bar{\mathbf{x}}_i} && \text{since } \|\bar{\mathbf{x}}_i\|_2 \leq 1 \text{ by Assumption 2} \\ &= G(\bar{\mathbf{w}}). \end{aligned}$$

Recall that  $\|\bar{\mathbf{w}}_t\|_2 \leq W_{\max}$ . So we have

$$\sup_t \|\nabla^2 G(\bar{\mathbf{w}}_t)\|_2 \leq \sup_{\|\bar{\mathbf{w}}\|_2 \leq W_{\max}} \|\nabla^2 G(\bar{\mathbf{w}})\|_2 \leq \sup_{\|\bar{\mathbf{w}}\|_2 \leq W_{\max}} G(\bar{\mathbf{w}}) =: G_{\max}. \quad (26)$$

Then we can apply Taylor's theorem to obtain that

$$\begin{aligned} G(\bar{\mathbf{w}}_{t+1}) &\leq G(\bar{\mathbf{w}}_t) + \langle \nabla G(\bar{\mathbf{w}}_t), \bar{\mathbf{w}}_{t+1} - \bar{\mathbf{w}}_t \rangle + \frac{G_{\max}}{2} \cdot \|\bar{\mathbf{w}}_{t+1} - \bar{\mathbf{w}}_t\|_2^2 && \text{by (26)} \\ &= G(\bar{\mathbf{w}}_t) - \eta \cdot \langle \nabla G(\bar{\mathbf{w}}_t), \nabla_{\bar{\mathbf{w}}} L(w_t, \bar{\mathbf{w}}_t) \rangle + \frac{G_{\max}}{2} \cdot \|\nabla_{\bar{\mathbf{w}}} L(w_t, \bar{\mathbf{w}}_t)\|_2^2. \end{aligned}$$

Next we use Lemma B.8 with  $\mathbf{v} = -\nabla G(\bar{\mathbf{w}}_t)$  to get The cross-term is bounded by

$$\begin{aligned} & - \langle \nabla G(\bar{\mathbf{w}}_t), \nabla_{\bar{\mathbf{w}}} L(w_t, \bar{\mathbf{w}}_t) \rangle \\ & \leq -e^{-\gamma w_t} \cdot \|\nabla G(\bar{\mathbf{w}}_t)\|_2^2 + \|\nabla G(\bar{\mathbf{w}}_t)\|_2 \cdot (e^{-2\gamma w_t} \cdot G_{\max}^2 + e^{-\theta w_t} \cdot H_{\max}) \\ & \leq -e^{-\gamma w_t} \cdot \|\nabla G(\bar{\mathbf{w}}_t)\|_2^2 + G_{\max} \cdot (e^{-2\gamma w_t} \cdot G_{\max}^2 + e^{-\theta w_t} \cdot H_{\max}). && \text{by (26)} \end{aligned}$$

Using the above and the gradient norm bound from Lemma B.9, we get that

$$\begin{aligned} G(\bar{\mathbf{w}}_{t+1}) &\leq G(\bar{\mathbf{w}}_t) - \eta e^{-\gamma w_t} \cdot \|\nabla G(\bar{\mathbf{w}}_t)\|_2^2 \\ &\quad + \eta e^{-2\gamma w_t} \cdot G_{\max}^3 + \eta e^{-\theta w_t} \cdot G_{\max} \cdot H_{\max} + \eta^2 e^{-2\gamma w_t} \cdot (G_{\max} + H_{\max})^2 \\ &\leq G(\bar{\mathbf{w}}_t) + \eta e^{-2\gamma w_t} \cdot G_{\max}^3 + \eta e^{-\theta w_t} \cdot G_{\max} \cdot H_{\max} + \eta^2 e^{-2\gamma w_t} \cdot (G_{\max} + H_{\max})^2 \\ &\leq G(\bar{\mathbf{w}}_t) + 2(\eta + \eta^2) \cdot G_{\max} \cdot (G_{\max}^2 + H_{\max}^2) \cdot (e^{-2\gamma w_t} + e^{-\theta w_t}), \end{aligned}$$

where in the last inequality we use that  $G_{\max} \geq G_{\min} \geq 1$  by Definition 3.

From the above we have

$$G(\bar{\mathbf{w}}_{t+k}) \leq G(\bar{\mathbf{w}}_t) + 2(\eta + \eta^2) \cdot G_{\max} \cdot (G_{\max}^2 + H_{\max}^2) \cdot \sum_{s=t}^{s+k} (e^{-2\gamma w_s} + e^{-\theta w_s}). \quad (27)$$

The summation is small by Lemma B.6, because

$$\begin{aligned} & \sum_{s=t}^{s+k} (e^{-2\gamma w_s} + e^{-\theta w_s}) \\ & \leq \sum_{s=t}^{s+k} \left( \frac{2}{2 + \eta\gamma^2 \cdot s} \right)^2 + \sum_{s=t}^{s+k} \left( \frac{2}{2 + \eta\gamma^2 \cdot s} \right)^{\frac{\theta}{\gamma}} && \text{by Lemma B.6} \\ & \leq \left( \frac{2}{\eta\gamma^2} \right)^2 \cdot \sum_{s=t}^{s+k} s^{-2} + \left( \frac{2}{\eta\gamma^2} \right)^{\frac{\theta}{\gamma}} \cdot \sum_{s=t}^{s+k} s^{-\frac{\theta}{\gamma}} \end{aligned}$$

$$\begin{aligned}
&\leq \left(\frac{2}{\eta\gamma^2}\right)^2 \cdot (t-1)^{-1} + \left(\frac{2}{\eta\gamma^2}\right)^{\frac{\theta}{\gamma}} \cdot \frac{(t-1)^{1-\frac{\theta}{\gamma}}}{\frac{\theta}{\gamma} - 1} && \text{by integral inequality} \\
&\leq \max \left\{ \left(\frac{2}{\eta\gamma^2}\right)^2, \left(\frac{2}{\eta\gamma^2}\right)^{\theta/\gamma} \right\} \cdot \frac{\theta}{\theta - \gamma} \cdot \left( (t-1)^{-1} + (t-1)^{1-\frac{\theta}{\gamma}} \right).
\end{aligned}$$

535 Inserting the above into (27) completes the proof.  $\square$

536 We now prove the convergence of the iterates projected on the non-separable subspace.

537 **Lemma B.11** (Convergence on the non-separable subspace). *Suppose Assumptions 1, 2, and 3 hold.*  
538 *Then it holds that*

$$G(\bar{\mathbf{w}}_T) - G(\bar{\mathbf{w}}_*) \leq \frac{c_1}{\log(T)}, \quad T \geq 3,$$

539 where  $c_1 > 0$  is a polynomial on  $\{e^\eta, e^n, e^{1/b}, \frac{1}{\eta}, \frac{1}{\theta-\gamma}, \frac{1}{\gamma}, e^{\theta/\gamma}\}$  and is independent of  $T$ .

540 *Proof.* The proof is conducted in several steps.

541 **Step 1: one-step function value bound.** Observe that

$$\begin{aligned}
\|\bar{\mathbf{w}}_{t+1} - \bar{\mathbf{w}}_*\|_2^2 &= \|\bar{\mathbf{w}}_t - \bar{\mathbf{w}}_*\|_2^2 + 2 \cdot \langle \bar{\mathbf{w}}_t - \bar{\mathbf{w}}_*, \bar{\mathbf{w}}_{t+1} - \bar{\mathbf{w}}_t \rangle + \|\bar{\mathbf{w}}_{t+1} - \bar{\mathbf{w}}_t\|_2^2 \\
&= \|\bar{\mathbf{w}}_t - \bar{\mathbf{w}}_*\|_2^2 - 2\eta \cdot \langle \bar{\mathbf{w}}_t - \bar{\mathbf{w}}_*, \nabla_{\bar{\mathbf{w}}} L(w_t, \bar{\mathbf{w}}_t) \rangle + \eta^2 \cdot \|\nabla_{\bar{\mathbf{w}}} L(w_t, \bar{\mathbf{w}}_t)\|_2^2.
\end{aligned}$$

542 For the cross-term, we apply Lemma B.8 with  $\mathbf{v} = -(\bar{\mathbf{w}}_t - \bar{\mathbf{w}}_*)$  to obtain

$$\begin{aligned}
&-\langle \bar{\mathbf{w}}_t - \bar{\mathbf{w}}_*, \nabla_{\bar{\mathbf{w}}} L(w_t, \bar{\mathbf{w}}_t) \rangle \\
&\leq -e^{-\gamma w_t} \cdot \langle \bar{\mathbf{w}}_t - \bar{\mathbf{w}}_*, \nabla G(\bar{\mathbf{w}}_t) \rangle + \|\bar{\mathbf{w}}_t - \bar{\mathbf{w}}_*\|_2 \cdot (e^{-2\gamma w_t} \cdot G_{\max}^2 + e^{-\theta w_t} \cdot H_{\max}) \\
&\leq -e^{-\gamma w_t} \cdot \langle \bar{\mathbf{w}}_t - \bar{\mathbf{w}}_*, \nabla G(\bar{\mathbf{w}}_t) \rangle + (W_{\max} + \|\bar{\mathbf{w}}_*\|_2) \cdot (e^{-2\gamma w_t} \cdot G_{\max}^2 + e^{-\theta w_t} \cdot H_{\max}) \\
&\leq -e^{-\gamma w_t} \cdot \langle \bar{\mathbf{w}}_t - \bar{\mathbf{w}}_*, \nabla G(\bar{\mathbf{w}}_t) \rangle + 2W_{\max} \cdot (e^{-2\gamma w_t} \cdot G_{\max}^2 + e^{-\theta w_t} \cdot H_{\max}),
\end{aligned}$$

543 where the second inequality is by Lemma B.3, and the last inequality is by Lemma B.4. Using the  
544 above and the gradient norm bound from Lemma B.9, we get that

$$\begin{aligned}
\|\bar{\mathbf{w}}_{t+1} - \bar{\mathbf{w}}_*\|_2^2 &\leq \|\bar{\mathbf{w}}_t - \bar{\mathbf{w}}_*\|_2^2 - 2\eta e^{-\gamma w_t} \cdot \langle \bar{\mathbf{w}}_t - \bar{\mathbf{w}}_*, \nabla G(\bar{\mathbf{w}}_t) \rangle \\
&\quad + 4\eta \cdot W_{\max} \cdot (e^{-2\gamma w_t} \cdot G_{\max}^2 + e^{-\theta w_t} \cdot H_{\max}) \\
&\quad + \eta^2 \cdot e^{-2\gamma w_t} \cdot (G_{\max} + H_{\max})^2.
\end{aligned} \tag{28}$$

545 By the convexity of  $G(\cdot)$ , we have

$$\langle \bar{\mathbf{w}}_t - \bar{\mathbf{w}}_*, \nabla G(\bar{\mathbf{w}}_t) \rangle \geq G(\bar{\mathbf{w}}_t) - G(\bar{\mathbf{w}}_*). \tag{29}$$

546 So we get

$$\begin{aligned}
2\eta e^{-\gamma w_t} \cdot (G(\bar{\mathbf{w}}_t) - G(\bar{\mathbf{w}}_*)) &\leq 2\eta e^{-\gamma w_t} \cdot \langle \bar{\mathbf{w}}_t - \bar{\mathbf{w}}_*, \nabla G(\bar{\mathbf{w}}_t) \rangle && \text{by (29)} \\
&\leq \|\bar{\mathbf{w}}_t - \bar{\mathbf{w}}_*\|_2^2 - \|\bar{\mathbf{w}}_{t+1} - \bar{\mathbf{w}}_*\|_2^2 \\
&\quad + 4\eta \cdot W_{\max} \cdot (e^{-2\gamma w_t} \cdot G_{\max}^2 + e^{-\theta w_t} \cdot H_{\max}) \\
&\quad + \eta^2 \cdot e^{-2\gamma w_t} \cdot (G_{\max} + H_{\max})^2 && \text{by (28)} \\
&\leq \|\bar{\mathbf{w}}_t - \bar{\mathbf{w}}_*\|_2^2 - \|\bar{\mathbf{w}}_{t+1} - \bar{\mathbf{w}}_*\|_2^2 \\
&\quad + 6\eta \cdot W_{\max} \cdot (G_{\max}^2 + H_{\max}^2) \cdot (e^{-2\gamma w_t} + e^{-\theta w_t}), && (30)
\end{aligned}$$

547 where we use  $\eta \leq W_{\max} := \max\{4n/b, \eta n^2/b\} + \eta n$  in the last inequality.

548 **Step 2: the sum of function values stays bounded.** Observe that

$$\begin{aligned}
\sum_{t=2}^T (e^{-2\gamma w_t} + e^{-\theta w_t}) &\leq \sum_{t=2}^T \left( \frac{2}{2 + \eta\gamma^2 \cdot t} \right)^2 + \sum_{t=2}^T \left( \frac{2}{2 + \eta\gamma^2 \cdot t} \right)^{\frac{\theta}{\gamma}} \quad \text{by Lemma B.6} \\
&\leq \left( \frac{2}{\eta\gamma^2} \right)^2 \cdot \sum_{t=2}^T t^{-2} + \left( \frac{2}{\eta\gamma^2} \right)^{\frac{\theta}{\gamma}} \cdot \sum_{t=2}^T t^{-\frac{\theta}{\gamma}} \\
&\leq \left( \frac{2}{\eta\gamma^2} \right)^2 \cdot 1 + \left( \frac{2}{\eta\gamma^2} \right)^{\frac{\theta}{\gamma}} \cdot \frac{1}{\theta/\gamma - 1} \\
&\leq \max \left\{ \left( \frac{2}{\eta\gamma^2} \right)^2, \left( \frac{2}{\eta\gamma^2} \right)^{\theta/\gamma} \right\} \cdot \frac{\theta}{\theta - \gamma}. \tag{31}
\end{aligned}$$

549 Taking telescope summation over (30), we obtain

$$\begin{aligned}
&\sum_{t=2}^T 2\eta e^{-\gamma w_t} \cdot (G(\bar{\mathbf{w}}_t) - G(\bar{\mathbf{w}}_*)) \\
&\leq \|\bar{\mathbf{w}}_2 - \bar{\mathbf{w}}_*\|_2^2 - \|\bar{\mathbf{w}}_{T+1} - \bar{\mathbf{w}}_*\|_2^2 \\
&\quad + 6\eta \cdot W_{\max} \cdot (G_{\max}^2 + H_{\max}^2) \cdot \sum_{t=2}^T (e^{-2\gamma w_t} + e^{-\theta w_t}) \quad \text{by (30)} \\
&\leq 2W_{\max} + 6\eta \cdot W_{\max} \cdot (G_{\max}^2 + H_{\max}^2) \cdot \max \left\{ \left( \frac{2}{\eta\gamma^2} \right)^2, \left( \frac{2}{\eta\gamma^2} \right)^{\theta/\gamma} \right\} \cdot \frac{\theta}{\theta - \gamma} \quad \text{by (31)} \\
&= 2W_{\max} + 18W_{\max} \cdot c_0,
\end{aligned}$$

550 where

$$c_0 := \eta \cdot (G_{\max}^2 + H_{\max}^2) \cdot \frac{\theta}{\theta - \gamma} \cdot \max \left\{ \left( \frac{2}{\eta\gamma^2} \right)^2, \left( \frac{2}{\eta\gamma^2} \right)^{\theta/\gamma} \right\}$$

551 is a constant (a polynomial on  $\{e^\eta, e^n, e^{1/b}, \frac{1}{\eta}, \frac{1}{\theta - \gamma}, \frac{1}{\gamma}, e^{\theta/\gamma}\}$  and is independent of  $t$ ) defined in  
552 Lemma B.10.

553 **Step 3: function value decreases, approximately.** For  $T \geq t \geq 1$ , we have

$$G(\bar{\mathbf{w}}_T) \leq G(\bar{\mathbf{w}}_t) + c_0 \cdot 2(1 + \eta)G_{\max} \cdot \left( (t-1)^{-1} + (t-1)^{1-\frac{\theta}{\gamma}} \right), \quad \text{by Lemma B.10}$$

554 which implies that

$$\begin{aligned}
&2\eta e^{-\gamma w_t} \cdot (G(\bar{\mathbf{w}}_T) - G(\bar{\mathbf{w}}_*)) \\
&\leq 2\eta e^{-\gamma w_t} \cdot (G(\bar{\mathbf{w}}_t) - G(\bar{\mathbf{w}}_*)) + 2\eta e^{-\gamma w_t} \cdot c_0 \cdot 2(1 + \eta)G_{\max} \cdot \left( (t-1)^{-1} + (t-1)^{1-\frac{\theta}{\gamma}} \right) \\
&\leq 2\eta e^{-\gamma w_t} \cdot (G(\bar{\mathbf{w}}_t) - G(\bar{\mathbf{w}}_*)) \\
&\quad + 2\eta \cdot \frac{2}{2 + \eta\gamma^2 \cdot t} \cdot c_0 \cdot 2(1 + \eta)G_{\max} \cdot \left( (t-1)^{-1} + (t-1)^{1-\frac{\theta}{\gamma}} \right) \quad \text{by Lemma B.6} \\
&\leq 2\eta e^{-\gamma w_t} \cdot (G(\bar{\mathbf{w}}_t) - G(\bar{\mathbf{w}}_*)) + \frac{8(1 + \eta)c_0}{\gamma^2} \cdot \left( (t-1)^{-2} + (t-1)^{-\frac{\theta}{\gamma}} \right). \tag{32}
\end{aligned}$$

555 **Step 4: the last function value is small.** Taking summation of (32) over  $t = 2, \dots, T$ , we get

$$\begin{aligned}
&\sum_{t=2}^T 2\eta e^{-\gamma w_s} \cdot (G(\bar{\mathbf{w}}_T) - G(\bar{\mathbf{w}}_*)) \\
&\leq \sum_{t=2}^T 2\eta e^{-\gamma w_t} \cdot (G(\bar{\mathbf{w}}_t) - G(\bar{\mathbf{w}}_*)) + \frac{8(1 + \eta)c_0}{\gamma^2} \cdot \sum_{t=2}^T \left( (t-1)^{-2} + (t-1)^{-\frac{\theta}{\gamma}} \right)
\end{aligned}$$



$$\begin{aligned}
&\leq \sum_{t=2}^T 2\eta e^{-\gamma w_t} \cdot (G(\bar{\mathbf{w}}_t) - G(\bar{\mathbf{w}}_*)) + \frac{8(1+\eta)c_0}{\gamma^2} \cdot \left(2 + 1 + \frac{1}{\theta/\gamma - 1}\right) \\
&\leq 2W_{\max} + 18W_{\max} \cdot c_0 + \frac{8(1+\eta)c_0}{\gamma^2} \cdot \frac{3\theta}{\theta - \gamma}. \tag{by (31)}
\end{aligned}$$

556 We also have

$$\begin{aligned}
\sum_{t=2}^T e^{-\gamma w_t} &\geq \frac{1}{e\eta\gamma^2 G_{\max} + e\eta\gamma H_{\max}} \cdot \sum_{t=2}^T \frac{1}{t+1} \tag{by Lemma B.7} \\
&\geq \frac{1}{e\eta\gamma^2 G_{\max} + e\eta\gamma H_{\max}} \cdot (\log(T+1) - \log(3))
\end{aligned}$$

557 Putting these together, we get

$$G(\bar{\mathbf{w}}_T) - G(\bar{\mathbf{w}}_*) \leq \left(2W_{\max} + 18W_{\max} \cdot c_0 + \frac{8(1+\eta)c_0}{\gamma^2} \cdot \frac{3\theta}{\theta - \gamma}\right) \cdot \frac{e\eta\gamma^2 G_{\max} + e\eta\gamma H_{\max}}{\log(T+1) - \log(3)},$$

558 where

$$c_0 := \eta \cdot (G_{\max}^2 + H_{\max}^2) \cdot \frac{\theta}{\theta - \gamma} \cdot \max \left\{ \left( \frac{2}{\eta\gamma^2} \right)^2, \left( \frac{2}{\eta\gamma^2} \right)^{\theta/\gamma} \right\}$$

559 is a polynomial on  $\{e^\eta, e^n, e^{1/b}, \frac{1}{\eta}, \frac{1}{\theta-\gamma}, \frac{1}{\gamma}, e^{\theta/\gamma}\}$ . So for  $T \geq 3$ , we have

$$G(\bar{\mathbf{w}}_T) - G(\bar{\mathbf{w}}_*) \leq \frac{1}{\log(T)} \cdot c_1,$$

560 where  $c_1$  is a polynomial on  $\{e^\eta, e^n, e^{1/b}, \frac{1}{\eta}, \frac{1}{\theta-\gamma}, \frac{1}{\gamma}, e^{\theta/\gamma}\}$  and is independent of  $T$ . □

## 561 C Proofs Missing from the Main Paper

### 562 C.1 Proof of Theorem 4.1

563 *Proof of Theorem 4.1.* Theorem 4.1 is a consequence of our analysis in Appendix B.

564 (C) is because of Lemma B.3.

565 (B) is because of Lemma B.6.

566 (D) is because of Lemma B.11.

567 (A) is because of the following:

$$\begin{aligned}
 L(\mathbf{w}_t) &= \sum_{i=1}^n \log(1 + \exp(-w_t x_i - \mathbf{w}_t^\top \mathbf{x}_i)) \\
 &\leq \sum_{i=1}^n \exp(-w_t x_i - \mathbf{w}_t^\top \mathbf{x}_i) \\
 &\leq \exp(-w_t \cdot \gamma) \cdot \sum_{i=1}^n \exp(-\mathbf{w}_t^\top \mathbf{x}_i) \\
 &\leq c / \log(t),
 \end{aligned}$$

568 where the last inequality is because that

$$\exp(-w_t \cdot \gamma) \leq \frac{2}{2 + \eta \gamma^2 \cdot t}$$

569 by Lemma B.6 and that  $\sum_{i=1}^n \exp(-\mathbf{w}_t^\top \mathbf{x}_i)$  is uniformly bounded by a constant by Definition 3.  $\square$

### 570 C.2 Proof of Theorem 4.2

571 *Proof of Theorem 4.2.* The GD iterates can be written as

$$w_{t+1} = w_t + \eta \gamma \cdot e^{-\gamma w_t} \cdot (e^{-\bar{w}_t} + e^{\bar{w}_t}), \quad (33)$$

$$\bar{w}_{t+1} = \bar{w}_t - \eta e^{-\gamma w_t} \cdot (e^{-\bar{w}_t} - e^{\bar{w}_t}). \quad (34)$$

572 We claim that: for every  $t \geq 0$ ,

573 1.  $w_t \geq 0$ .

574 2.  $|\bar{w}_t| \geq 1$ .

575 3.  $|\bar{w}_t| \geq 2\gamma w_t$ .

576 We prove the claim by induction. For  $t = 0$ , it holds by assumption. Now suppose that the claim  
577 holds for  $t$  and consider the case of  $t + 1$ .

578 1.  $w_{t+1} \geq 0$  holds since  $w_{t+1} \geq w_t$  by (33) and  $w_t \geq 0$  by the induction hypothesis.

579 2.  $|\bar{w}_{t+1}| \geq 1$  holds because

$$\begin{aligned}
 |\bar{w}_{t+1}| &\geq \eta e^{-\gamma w_t} \cdot |e^{-\bar{w}_t} - e^{\bar{w}_t}| - |\bar{w}_t| \quad \text{by (34)} \\
 &\geq \eta e^{-\gamma w_t} \cdot \frac{e^{|\bar{w}_t|}}{2} - |\bar{w}_t| \quad \text{since } |\bar{w}_t| \geq 1 \text{ and that } e^t - e^{-t} \geq \frac{e^t}{2} \text{ for } t \geq 1 \\
 &\geq 2e^{|\bar{w}_t| - \gamma w_t} - |\bar{w}_t| \quad \text{since } \eta \geq 4 \\
 &\geq 2e^{|\bar{w}_t|/2} - |\bar{w}_t| \quad \text{since } \frac{|\bar{w}_t|}{2} \geq \gamma w_t \\
 &\geq 1. \quad \text{since } 2e^{t/2} \geq t + 1 \text{ for } t \in \mathbb{R}
 \end{aligned} \quad (35)$$

580 3. To prove that  $|\bar{w}_{t+1}| \geq 2\gamma w_t$ , first observe that

$$\begin{aligned} w_{t+1} &= w_t + \eta\gamma \cdot e^{-\gamma w} \cdot (e^{-\bar{w}} + e^{\bar{w}}) \\ &\leq w_t + \eta\gamma \cdot e^{-\gamma w} \cdot 2 \cdot e^{|\bar{w}_t|}. \end{aligned} \quad (36)$$

581 Then we have

$$\begin{aligned} &|\bar{w}_{t+1}| - 2\gamma w_{t+1} \\ &\geq \eta e^{-\gamma w_t} \cdot \frac{e^{|\bar{w}_t|}}{2} - |\bar{w}_t| - 2\gamma \left( w_t + \eta\gamma \cdot e^{-\gamma w} \cdot 2 \cdot e^{|\bar{w}_t|} \right) \quad \text{by (35) and (36)} \\ &= \frac{\eta}{2} \cdot (1 - 8\gamma^2) \cdot e^{|\bar{w}_t| - \gamma w_t} - |\bar{w}_t| - 2\gamma w_t \\ &\geq e^{|\bar{w}_t| - \gamma w_t} - |\bar{w}_t| - 2\gamma w_t \quad \text{since } \eta \geq 4 \geq 2/(1 - 8\gamma^2) \\ &\geq e^{|\bar{w}_t| - \gamma w_t} - |\bar{w}_t| \quad \text{since } w_t \geq 0 \\ &\geq e^{|\bar{w}_t|/2} - |\bar{w}_t| \quad \text{since } \frac{|\bar{w}_t|}{2} \geq \gamma w_t \\ &\geq 0. \quad \text{since } e^{t/2} \geq t \text{ for } t \in \mathbb{R} \end{aligned}$$

582 We have completed the induction.

583 Finally, we prove the claims in Theorem 4.2 using the above results.

584 (B) is because of

$$w_{t+1} \geq w_t + \eta\gamma \cdot e^{-\gamma w_t}$$

585 from (33).

586 We have already proved (C) by induction.

587 To show (D), without lose of generality, let us assume  $\bar{w}_t \geq 0$ , then

$$\begin{aligned} \bar{w}_{t+1} &\leq \bar{w}_t - \eta e^{-\gamma w_t} \cdot |e^{-\bar{w}_t} - e^{\bar{w}_t}| \quad \text{by (34)} \\ &\leq \bar{w}_t - \eta e^{-\gamma w_t} \cdot \frac{e^{|\bar{w}_t|}}{2} \quad \text{since } |\bar{w}_t| \geq 1 \text{ and that } e^t - e^{-t} \geq \frac{e^t}{2} \text{ for } t \geq 1 \\ &\leq \bar{w}_t - 2e^{|\bar{w}_t| - \gamma w_t} \quad \text{since } \eta \geq 4 \\ &\leq \bar{w}_t - 2e^{|\bar{w}_t|/2} \quad \text{since } \frac{|\bar{w}_t|}{2} \geq \gamma w_t \\ &\leq -1. \quad \text{since } 2e^{t/2} \geq t + 1 \text{ for } t \in \mathbb{R} \end{aligned}$$

588 We can repeat the above argument to show that  $\bar{w}_{t+1} > 0$  if  $\bar{w}_t \leq 0$ .

589 To show (A), we apply  $w_t \rightarrow \infty$  and that  $|\bar{w}_t| \geq 2\gamma w_t$ :

$$\begin{aligned} L(w_t, \bar{w}_t) &= e^{-\gamma w_t} \cdot (e^{-\bar{w}_t} + e^{\bar{w}_t}) \\ &\geq e^{-\gamma w_t} \cdot e^{|\bar{w}_t|} \\ &\geq e^{\gamma w_t} \rightarrow \infty. \end{aligned}$$

590 We have completed all the proofs. □

## 591 D Experimental Setups

592 **Neural network experiments.** We randomly sample 1,000 data from the MNIST<sup>3</sup> dataset as the  
593 training set and use the remaining data as the test set. The feature vectors are normalized such that  
594 each feature is within  $[-1, 1]$ .

595 We use a fully connected network with the following structure

$$784 \rightarrow \text{ReLU} \rightarrow 500 \rightarrow \text{ReLU} \rightarrow 500 \rightarrow \text{ReLU} \rightarrow 10.$$

596 The network is initialized with Kaiming initialization. We use the cross-entropy loss.

597 We consider constant-stepsize GD with two types of stepsizes,  $\eta = 0.1$  and  $\eta = 0.01$ .

598 The results are presented in Figure 1.

599 **Logistic regression experiments.** We randomly sample 1,000 data with labels “0” and “8” from  
600 the MNIST dataset as the training set. The feature vectors are normalized such that each feature is  
601 within  $[-1, 1]$ .

602 We use a linear model without bias. So the number of parameters is 784. The model is initialized  
603 from zero. We use the binary cross-entropy loss, i.e., the logistic loss.

604 We consider constant-stepsize GD with three types of stepsizes,  $\eta = 10$ ,  $\eta = 0.1$ , and  $\eta = 0.01$ .

605 The results are presented in Figure 2.

---

<sup>3</sup><http://yann.lecun.com/exdb/mnist/>
